# Supplementary material
Source: PubMed Central journal article supplement (PMC7482282)
Supplement: rspb20201537supp1.pdf [file rspb20201537supp1.pdf]

# Rovinsky et al. 2020

## Supplemental Material

### S1: Notes on historical thylacine body masses

#### Recorded thylacine body masses

##### Crisp (1855)

The specimen (male) described by Crisp (1855) resided at the Zoological Society of London (ZSL) Gardens after being snared in Tasmania in 1849 until its death (possibly in 1853; Sleightholme & Campbell, 2018). Crisp noted that the animal was “excessively fat” at the time of death, was weighed at 33 lbs (~15 kg), and measured 2 ft. 9.5 in. (approx. 851 mm) from nose to root of tail, with a tail 15 inches (381 mm) in length.

##### ZSL London Zoo Death Book No. 739 (1914)

This specimen was a female, purchased from the Beaumaris Zoo, Hobart, in April of 1910. The animal died June 1914, and had a recorded weight of 29 pounds (~13.2 kg) in the post mortem record.

##### ZSL London Zoo Death Book No. 1426 (1914)

This male specimen, was purchased from the Beaumaris Zoo, April 1914. It died seven months later in November of 1914. Recorded mass in the post mortem was 57.5 pounds (~26.1 kg).

##### Berns & Ashwell (2017)

The thylacine in Berns & Ashwell (Berns & Ashwell, 2017), is specimen USNM 125345 (14.97 kg). This is the male pouched young in the Joseph M. Gleeson 1902 ‘Family portrait’ – the only known painting from life of a thylacine and her offspring. The specimen entered the collection records in January 1905, and so was at least 2-3 years of age at death. Notably, the M4 had not reached full occlusal position at the time of death, indicating that the specimen was not yet a dentally mature adult (see: Smithsonian National Museum of Natural History Mammal Collections: <http://n2t.net/ark:/65665/30f03f85e-2a54-45ee-b968-46d8de58a9ec>).

These four recorded masses (one female, three males) average to 17.3 kg.

#### Periodical reports.

*Weights bolded (emphasis and metric conversion my own).*

Sydney Gazette, 21/4/1805, p.3, quoting correspondence by Lt. Governor William Paterson:

“An animal of a truly singular and novel description was killed by dogs the 30th of March on a hill immediately contiguous to the settlement at Yorkton Port Dalrymple; from the following minute description of which, by Lieutenant Governor PATERSON, it must be considered of a species perfectly distinct from any of the animal creation hitherto known, and certainly the only powerful and terrific of the carnivorous and voracious tribe yet discovered on any part of New Holland or its adjacent islands.

'It is very evident his species is destructive, and lives entirely on animal food; as on dissection his stomach was found filled with a quantity of kangaroo, weight 5 lbs, the weight of the whole animal **45 lbs (20.4 kg)**. From its interior structure it must be a brute peculiarly quick of digestion; the dimensions were, from the nose to the eye 4 ½ inches; length of the eye, which is remarkable large and black, 1 ¾ inches; breadth of the eye ¾ of an inch; from the nose to the extent of the mouth in the upper jaw, 6 inches; and to the extent of the under jaw, 4 ½; breadth of the forehead, 5 ¾ inches; from the eye to the ear, 3 ¾ inches; the ear round, diameter 3 inches; from the ear to the shoulder, 1 foot; from the shoulder to the first stripe, 7 inches; from the first stripe to the extent of the body, 2 feet; length of the tail, 1 foot 8 inches; length of the fore leg 11 inches; and of the forefoot, 5 inches; the forefoot with 5 blunt claws; height of the animal before, 1 foot 10 inches; stripes across the back 20, on the tail 3; 2 of the stripes extend down each thigh; length of the hind leg from the heel to the thigh, 1 foot; length of the hind foot, 6 inches; the hind foot with 4 blunt claws, the soles of the feet without hair; on each side of the mouth are 19 bristles, length of each 4 inches; and 6 bristles on each side under the ear, 9 on the lower jaw upon each side, and 8 under the throat; 8 fore teeth in the upper and lower jaw, 3 single teeth also in each; 4 tusks, or canine teeth, length of each 1 inch; circumference of the head before the ears, 1 foot 6 inches, and behind the ears, 1 foot 5 inches; smallest part of neck, 1 foot 4 inches; circumference before the shoulder, 2 feet; the body short hair and smooth, of a greyish colour, the stripes black; the hair on the neck rather longer than that on the body; the hair on the ears of a light brown colour, on the inside rather long. The form of the animal is that of the hyaena, at the same time strongly reminding the observer of the appearance of a low wolf dog. The lips do not appear to conceal the tusks.'

Launceston Examiner, 14/3/1868, p.2:

"ENCOUNTER WITH A HYENA.—On Thursday, the 4th instant, Mrs. Thomas Harman—who resides in a lonesome place about a mile from the Black River bridge—was much disturbed in the absence of her husband by hearing a noise among some young pigs, and on going to ascertain the cause was immediately attacked by a spotted hyena which followed her to the house, somewhat checked by a little dog. Mrs. Harman procured a large stick or bludgeon and again sallied forth. Two small dogs had then attacked the animal; one fastened itself to the throat of the hyena, and prevented the ferocious brute from using its full power, thus enabling Mrs. Hartman to kill it after a considerable battle.

The hyena though common on this side of Tasmania is seldom seen and rarely visits the settled parts. I killed one of them some years ago weighing **72 lbs (32.7 kg)**. after it had destroyed 25 sheep—eight of them in one night. I put the sheep afterwards in my barn-yard, and had a watch kept. The hyena came as soon as it was dark and killed a sheep, but was shot down with coarse slugs of lead, when he made a furious onslaught on the man, who fought for his life, breaking a double-barrel gun to pieces in the fight. The hyena has immensely powerful teeth and equally strong jaws, enabling him to break almost any bone with perfect ease."

Cornwall Chronicle, 2/9/1868, p.4:

"NATIVE TIGER.—A large specimen of the Tasmanian tiger was caught in a kangaroo snare, at the Silver Mines, last week. It weighed **67 lbs. (30.4 kg)**, and had a mouth well filled with wolf-like teeth. The skin has been forwarded to Mr John Thomson."

Le Soef, 1875 (in Commissioners of the Victorian Intercolonial Exhibition), p.261:

"The devil and Tasmanian tiger are formidable beasts, and make great havoc amongst the flocks. The tiger is a low, long-bodied animal, with powerful forequarters, and a dog-like head, weighing sometimes from **60 lb. to 70 lb (27.2—31.8 kg)**. The devil, though not so large, is far more hideous in appearance than the tiger."

Launceston Examiner, 28/5/1887, p.2:

“TASMANIAN TIGER.—We have been shown the skin of a very fine specimen of a Tasmanian tiger, bearing sixteen stripes, which was recently killed by Mr. W. T. Freeman, at Harrymount, near Avoca, the property of Mr. Frank O’Connor, of Benham. His tigership measured five feet from tip to tip, and weighed about **60 lbs. (27.2 kg)**, while his height was about 2ft. 6in. We understand that the skeleton of the animal has been secured by a naturalist, who is on a visit to Tasmania for the Calcutta Museum, by whom two native devil skeletons were also recently secured at Bonney’s Plains, the property of Mr. J. Rigney, for the same institution.”

Launceston Examiner, 22/11/1887, p.2:

“FROM a correspondent we learn that a large native tiger was recently killed on Christmas-hill (near Elizabeth Town), about a mile from Forest Hall, by Messrs. Jas. and E. Aylett and A. Walsh. Their sheep dogs started the tiger and brought him to bay, and the men ran up thinking a badger had been found. On seeing it was a tiger E. Aylett caught it by the tail and held it till Walsh came up with an axe and killed it. The animal measured 7ft. from the tip of his nose to the end of his tail, and weighed **65.5 lb (29.7 kg)**. Mr. Aylett intends having the skin stuffed. One would have thought these animals had long since deserted so old a settled district as that in which this tiger was found.”

Wellington Times, 28/7/1892, p.2:

“HOUSETOP NOTES.—Our correspondent writes under Tuesday’s date:—The weather here for the past month has been worse than any experienced for many years. The prospects of the claims are very good, the Burnie Tin Association have a splendid looking lode 8 lb to 10 lb of 60 per cent ore to the dish can be washed out of the best of it, and the whole formation, 4ft wide, carries tin; the alluvial s also payable. A large native tiger was caught here on Friday last by Mr. A. Tengdahl; the animal weighed **116 lbs (52.6 kg)** and the skin measures 6ft 7in long by 4ft across. He was caught in a spring snare, but broke the springer and got away for a considerable distance, but the broken portion of the pole caught in some bushes, and by going round and round he got hopelessly entangled and was shot. The beast is the largest of the kind I have heard of and has a beautifully marked skin with 17 broad black stripes across its back.”

Notes on specific thylacines.

These anecdotal reports seem to range from the extremely detailed and believable, such as that of Paterson (1805), to those that are somewhat more fanciful and invite scepticism.

If the Wellington Times (1892) thylacine was 6ft 7in (2007 mm) long, then by the principle of geometric similitude with the Paterson 1805 thylacine (approx. 6ft  $\frac{3}{4}$ in [1848 mm] from the above detailed description), the Wellington Times thylacine would be expected to weigh approximately 26.1 kg, not the stated 52.6 kg. Similarly, the Launceston Examiner (28/5/1887) thylacine, measured at 5 ft (1524 mm) from “tip to tip” would be expected to weigh approximately 11.4 kg, not the stated ~27.2 kg (~60 lbs).

In contrast, the “large” Launceston Examiner (22/11/1887) thylacine, measured at 7ft (2134 mm) would be expected to weigh approximately 31.4 kg, only 5.7% difference from the stated 29.7 kg (65.5 lbs). This serves to underscore the disparity between reliable and potentially unreliable anecdotal reports, and the difficulty in assessing their veracity.

It is evident from reading Le Soef (1875) that the upper limit of the thylacine’s size was being addressed “...sometimes from 60 lb to 70 lb...”, not an average size range, and perhaps inflated to ‘upsell’ the exhibition. It is likely, though unprovable, that the above specimens, regardless of actual size, also represent this upper limit bias. It is admittedly a “just so” expectation, but with a bounty in place by the 1830’s, we could expect the sighting and capture of a thylacine to be a relatively routine occurrence, with only outstanding specimens being newsworthy. Note how often adjectives such as “large”, “fine”, etc., occur in the periodical reports.

A comparison with the four masses provided in the scientific literature (~17.3 kg) and those given in the periodicals shows a dramatic difference. The mean value for the masses in the periodicals is 31.5 kg, and even removing the Wellington Times (1892) value as an outlier gives a mean mass of over 28 kg, nearly 40% larger than the values given in the literature.

## References S1

- Berns GS, and Ashwell KWS. 2017. Reconstruction of the cortical maps of the Tasmanian tiger and comparison to the Tasmanian devil. *PLoS ONE* 12:e0168993. 10.1371/journal.pone.0168993
- Crisp E. 1855. On some points relating to the anatomy of the Tasmanian wolf (*Thylacinus*) and of the Cape hunting dog (*Lycaon pictus*). *Proceedings of the Zoological Society of London* 23:188-192.
- Sleightholme SR, and Campbell CR. 2018. The International Thylacine Specimen Database (6th revision - project summary and final report). *Australian Zoologist* 39:480-512. 10.7882/AZ.2017.011

## S2: Specimen list

**Table S2a:** Specimen list. The “Linear metrics”, “Body mass”, and “3D GM” columns indicate if the specimen was analysed via those methods.

| Specimen               | Sex | Cranium | Mandible | Postcrania | Scan type | Linear metrics | Body mass | 3D GM |
|------------------------|-----|---------|----------|------------|-----------|----------------|-----------|-------|
| AM M 1821              | U   | Yes     | Yes      |            | Surface   | Yes            | Yes       |       |
| AM M 19465             | M   | Yes     | Yes      |            | Surface   | Yes            | Yes       | Yes   |
| AM M 27836             | U   | Yes     |          |            | Surface   | Yes            | Yes       |       |
| AM M 401               | U   | Yes     | Yes      |            | Surface   | Yes            | Yes       |       |
| AM M 402               | U   | Yes     | Yes      |            | Surface   | Yes            | Yes       |       |
| AM M 763               | U   | Yes     | Yes      |            | Surface   | Yes            | Yes       |       |
| AM M 767               | U   | Yes     |          |            | Surface   |                | Yes       |       |
| AM M 768               | U   | Yes     | Yes      |            | Surface   | Yes            | Yes       |       |
| AM M 769               | U   | Yes     | Yes      |            | Surface   | Yes            | Yes       |       |
| AM M 771               | U   | Yes     | Yes      |            | Surface   | Yes            | Yes       |       |
| AM M 788               | U   | Yes     | Yes      |            | Surface   |                | Yes       |       |
| AM M 789               | U   | Yes     | Yes      |            | Surface   |                | Yes       |       |
| AMNH 144316            | M   | Yes     | Yes      |            | Surface   | Yes            | Yes       |       |
| AMNH 146829            | U   | Yes     |          |            | Surface   | Yes            | Yes       |       |
| AMNH 35244             | M   | Yes     | Yes      | Yes        | Surface   | Yes            | Yes       |       |
| AMNH 35866             | U   | Yes     | Yes      | Yes        | Surface   | Yes            | Yes       |       |
| AMNH 42259             | U   |         |          | Yes        | Surface   |                | Yes       |       |
| NHМУK ZD 1963.8.30.1   | M   | Yes     | Yes      | Yes        | Surface   | Yes            | Yes       |       |
| NHМУK ZD 1972.175      | M   | Yes     | Yes      |            | Surface   |                | Yes       |       |
| NHМУK ZD 1839.6.11.3   | F   | Yes     | Yes      |            | Surface   | Yes            | Yes       | Yes   |
| NHМУK ZD 1846.4.4.1    | M   | Yes     | Yes      |            | Surface   | Yes            | Yes       | Yes   |
| NHМУK ZD 1852.1.16.7   | F   | Yes     | Yes      |            | Surface   | Yes            | Yes       | Yes   |
| NHМУK ZD 1852.1.16.8   | F   | Yes     | Yes      |            | Surface   | Yes            | Yes       |       |
| NHМУK ZD 1972.665      | M   | Yes     |          |            | Surface   | Yes            | Yes       | Yes   |
| NHМУK ZD 1972.666      | F   | Yes     | Yes      |            | Surface   | Yes            | Yes       | Yes   |
| NHМУK ZD 1883.8.22.1   | M   | Yes     |          |            | Surface   | Yes            | Yes       |       |
| NHМУK ZD 1893.4.13.1   | F   | Yes     | Yes      |            | Surface   | Yes            | Yes       |       |
| LEEDM C.1869.46.2.4088 | U   | Yes     | Yes      |            | Surface   | Yes            | Yes       |       |
| LEEDM C.1869.46.4.4087 | U   | Yes     | Yes      |            | Surface   | Yes            | Yes       |       |
| LEEDM C.1869.46.5.4091 | U   | Yes     | Yes      |            | Surface   | Yes            | Yes       |       |
| NHM 1000               | U   | Yes     | Yes      |            | Surface   |                | Yes       |       |
| NHM 1002               | U   | Yes     | Yes      |            | Surface   | Yes            | Yes       |       |
| USNM 124662            | F   | Yes     | Yes      | Yes        | CT        | Yes            | Yes       |       |
| USNM 155407            | M   | Yes     | Yes      | Yes        | CT        | Yes            | Yes       |       |
| USNM 38801             | M   | Yes     | Yes      | Yes        | CT        |                | Yes       |       |
| NMV C 2163.1           | M   | Yes     | Yes      |            | Surface   |                | Yes       |       |

|                   |   |     |     |     |         |     |     |     |
|-------------------|---|-----|-----|-----|---------|-----|-----|-----|
| NMV C 28178       | U | Yes | Yes | Yes | Surface |     | Yes |     |
| NMV C 28744       | F |     |     |     | Surface |     | Yes |     |
| NMV C 5741.2      | F |     |     | Yes | Surface |     | Yes |     |
| NMV C 5742.1      | F | Yes | Yes | Yes | Surface | Yes | Yes | Yes |
| NMV C 5746.1      | M | Yes | Yes | Yes | Surface | Yes | Yes |     |
| NMV C 5748.1      | F | Yes | Yes |     | Surface | Yes | Yes |     |
| NMV C 5749        | M | Yes | Yes |     | Surface | Yes | Yes | Yes |
| NMV C 5750.1      | F | Yes |     |     | Surface | Yes | Yes |     |
| NMV C 5752.2      | F |     |     | Yes | Surface |     | Yes |     |
| NMW 19.330.46     | U | Yes | Yes |     | Surface | Yes | Yes |     |
| NMW 27.409.9      | U | Yes | Yes |     | Surface | Yes | Yes |     |
| NRM 566599        | F | Yes | Yes | Yes | CT      | Yes | Yes |     |
| QM 11445          | U | Yes | Yes |     | Surface |     | Yes |     |
| QM 11446          | U | Yes | Yes |     | Surface |     | Yes |     |
| QM 1968           | U | Yes | Yes |     | Surface |     | Yes |     |
| QVM 1958:1:27     | M | Yes | Yes |     | Surface |     | Yes |     |
| QVM 1958:1:29     | U | Yes | Yes |     | Surface |     | Yes |     |
| QVM 1962:1:54     | U | Yes | Yes |     | Surface | Yes | Yes |     |
| QVM 1962:1:57     | U | Yes |     |     | Surface | Yes | Yes |     |
| RBINS 31.Z        | U | Yes | Yes |     | Surface | Yes | Yes |     |
| RBINS 32          | U | Yes | Yes |     | Surface | Yes | Yes |     |
| RBINS 32.B        | U | Yes | Yes |     | Surface | Yes | Yes |     |
| SAM M 1953        | M | Yes | Yes |     | Surface | Yes | Yes | Yes |
| SAM M 1955        | U | Yes | Yes |     | Surface | Yes | Yes |     |
| SAM M 1959        | F | Yes | Yes | Yes | Surface | Yes | Yes | Yes |
| SAM M 1960        | U | Yes | Yes | Yes | Surface | Yes | Yes |     |
| SAM M 922         | F | Yes | Yes |     | CT      | Yes | Yes | Yes |
| SAM M 95          | M | Yes | Yes | Yes | Surface | Yes | Yes | Yes |
| SMNS Z-MAM 002019 | M | Yes | Yes | Yes | Surface | Yes | Yes |     |
| TMAG A 1238       | U | Yes |     |     | Surface | Yes | Yes |     |
| TMAG A 1239       | U | Yes |     |     | Surface |     | Yes |     |
| TMAG A 1240       | U | Yes | Yes |     | Surface |     | Yes |     |
| TMAG A 1242       | U | Yes |     |     | Surface | Yes | Yes |     |
| TMAG A 1244       | U | Yes |     |     | Surface | Yes | Yes |     |
| TMAG A 1245       | U | Yes |     |     | Surface |     | Yes |     |
| TMAG A 1246       | U |     | Yes |     | Surface |     | Yes |     |
| TMAG A 1276       | U | Yes | Yes |     | Surface | Yes | Yes |     |
| TMAG A 1298       | M |     |     |     | Surface |     | Yes |     |
| TMAG A 1989       | U |     | Yes | Yes | Surface |     | Yes |     |
| TMAG A 1990       | U |     |     |     | Surface |     | Yes |     |
| TMAG A 2062       | U |     | Yes |     | Surface |     | Yes |     |
| TMAG A 2313       | U |     | Yes |     | Surface |     | Yes |     |
| TMAG A 244        | U | Yes | Yes |     | Surface | Yes | Yes |     |
| TMAG A 2455       | U |     | Yes | Yes | Surface |     | Yes |     |
| TMAG A 295        | U | Yes | Yes |     | Surface | Yes | Yes |     |
| TMAG A 297        | U | Yes | Yes | Yes | Surface | Yes | Yes |     |

|               |   |     |     |     |         |     |     |     |
|---------------|---|-----|-----|-----|---------|-----|-----|-----|
| TMAG A 312    | F | Yes | Yes | Yes | Surface |     | Yes |     |
| TMAG A 315    | M | Yes | Yes |     | Surface |     | Yes |     |
| TMAG A 321    | M | Yes | Yes | Yes | Surface | Yes | Yes | Yes |
| TMAG A 890    | U | Yes | Yes |     | Surface | Yes | Yes |     |
| UMZC A6.7/19  | U | Yes | Yes |     | Surface | Yes | Yes |     |
| UMZC A6.7/3   | U | Yes |     | Yes | Surface | Yes | Yes |     |
| UMZC A6.7/8   | F | Yes | Yes | Yes | Surface | Yes | Yes | Yes |
| WAM 195       | U | Yes | Yes | Yes | Surface | Yes | Yes |     |
| ZMB Mam 2986  | M | Yes | Yes |     | Surface | Yes | Yes |     |
| ZMB Mam 4264  | F |     | Yes |     | Surface | Yes | Yes |     |
| ZMB Mam 47902 | M | Yes | Yes |     | Surface | Yes | Yes |     |

**Table S2b:** Morphosource DOIs for volumetric models.

| Specimen    | Description                                    | doi                     |
|-------------|------------------------------------------------|-------------------------|
| NMV C 28178 | Textured volumetric sculpture                  | doi:10.17602/M2/M117328 |
| NMV C 28178 | Complete skeleton                              | doi:10.17602/M2/M117619 |
| NMV C 28744 | Taxidermied skin (mounted)                     | doi:10.17602/M2/M117324 |
| NRM 566599  | Complete skeleton                              | doi:10.17602/M2/M117337 |
| NRM 566599  | External surface of alcohol preserved specimen | doi:10.17602/M2/M117338 |
| TMAG A312   | Textured volumetric sculpture                  | doi:10.17602/M2/M117333 |
| TMAG A 1298 | Taxidermied skin (mounted)                     | doi:10.17602/M2/M117336 |
| TMAG A 315  | Complete skeleton (mounted)                    | doi:10.17602/M2/M117334 |
| TMAG A 315  | Textured volumetric sculpture                  | doi:10.17602/M2/M117335 |
| TMAG A312   | Complete skeleton                              | doi:10.17602/M2/M117618 |

### Note on S2:

We chose to reassign one sexed specimen (UMZC A6.7/3) to unknown. The specimen is listed in collections as male, and is noted to have derived from the skin UMZC A6.7/4. Moeller (1968) expressed doubt as to the correct sex assignment of the cranium and the attribution to the skin. We have not been able to inspect the skin for sex characteristics, but note that the cranium is adult, but very small and gracile, even if female (CBL: 189.6 mm; female mean 196.3, SD 8.96; see **Table S11** below). With this history in mind and the strongly aberrant size of the specimen, we feel that it is more conservative to change the sex to unknown in the analyses and attempt to *post hoc* assign the sex.

### References S2

Moeller HF. 1968. Zur Frage der Parallelerscheinungen bei Metatheria und Eutheria: Vergleichende Untersuchungen an Beutelwolf und Wolf. *Zeitschrift für Wissenschaftliche Zoologie* 177:283-392.

## S4: Diet and body mass data.

**Table S4a:** Specimen diet, body mass, and prey size. "Ref" number refers to reference list below in **Table S4b**.

| Taxa                           | Mass (kg) | Prey mass (kg) | Reference                                                                                           |
|--------------------------------|-----------|----------------|-----------------------------------------------------------------------------------------------------|
| <i>Acinonyx jubatus</i>        | 46.50     | 36.00          | Hayward et al., 2006                                                                                |
| <i>Atilax palidunosis</i>      | 3.30      | 0.05           | Baker, 1989                                                                                         |
| <i>Bassariscus sumichrasti</i> | 0.75      | 0.03           | Carbone et al., 2007                                                                                |
| <i>Canis lupaster</i>          | 11.00     | 2.00           | McShane & Grettenberger, 1984                                                                       |
| <i>Canis aureus</i>            | 11.00     | 1.00           | Lanszki & Heltai, 2002; Giannatos et al., 2010                                                      |
| Dingo                          | 15.00     | 10.00          | Whitehouse, 1977; Newsome et al., 1983; Paltridge, 2002                                             |
| <i>Canis latrans</i>           | 13.30     | 5.00           | Andelt et al., 1987; Kitchen et al., 1999                                                           |
| <i>Canis lupus</i>             | 50.00     | 50.00          | Gade-Jorgensen & Stagegaard, 2000; Capitani et al., 2003; Reed et al., 2006; Stenglein et al., 2011 |
| <i>Canis simensis</i>          | 14.70     | 1.00           | Sillero-Zubiri & Goettelli, 1995                                                                    |
| <i>Caracal caracal</i>         | 12.80     | 5.00           | Melville et al., 2004; Brackowski et al., 2012                                                      |
| <i>Chironectes minimus</i>     | 0.70      | 0.05           | Galliez et al., 2009; Marshall, 1978                                                                |
| <i>Chrysocyon brachyurus</i>   | 22.00     | 2.00           | Motta-Junior et al., 1996                                                                           |
| <i>Civettictus civetta</i>     | 13.50     | 1.00           | Angelici, 2000                                                                                      |
| <i>Crocuta crocuta</i>         | 62.50     | 100.00         | Holekamp et al., 1997; Hayward, 2006                                                                |
| <i>Cryptoprocta ferox</i>      | 7.10      | 1.30           | Dollar et al., 2007                                                                                 |
| <i>Cuon alpinus</i>            | 19.00     | 160.00         | Johnsingh, 1982; Hayward et al., 2014                                                               |
| <i>Dasyurus geoffroyii</i>     | 1.10      | 0.13           | Soderquist & Serena, 1999                                                                           |
| <i>Dasyurus hallucatus</i>     | 0.60      | 0.05           | Oakwood, 1997; Pollock, 1999                                                                        |
| <i>Dasyurus maculatus</i>      | 2.70      | 2.80           | Belcher, 1995; Glen & Dickman, 2006                                                                 |
| <i>Dasyurus viverrinus</i>     | 1.10      | 0.01           | Blackhall, 1980; Godsell, 1983                                                                      |
| <i>Didelphis marsupialis</i>   | 3.00      | 0.12           | Cordero & Nicolas, 1987                                                                             |
| <i>Felis chaus</i>             | 6.56      | 0.93           | Carbone et al., 2007                                                                                |
| <i>Felis lybica</i>            | 3.90      | 0.50           | Palmer & Fairall, 1988                                                                              |
| <i>Galerella sanguinea</i>     | 0.60      | 0.10           | Graw & Manser, 2017                                                                                 |
| <i>Genetta maculata</i>        | 1.90      | 0.10           | Angelici, 2000; Angelici & Luiselli, 2005                                                           |
| <i>Gulo gulo</i>               | 19.50     | 2.00           | Landa et al., 1997; Dalerum et al., 2009; Koskela et al., 2013                                      |



---

|                                   |        |        |                                                                                                     |
|-----------------------------------|--------|--------|-----------------------------------------------------------------------------------------------------|
| <i>Herpailurus yagouaroundi</i>   | 6.80   | 1.00   | Tófoli et al., 2009                                                                                 |
| <i>Leopardus pardalis</i>         | 12.50  | 1.00   | de Villa Meza et al., 2002; Abreu et al., 2007                                                      |
| <i>Leptailurus serval</i>         | 14.00  | 0.05   | Nbowland & Perrin, 1993                                                                             |
| <i>Lupulella adustus</i>          | 10.30  | 3.00   | Atkinson et al., 2002                                                                               |
| <i>Lupulella mesomelas</i>        | 14.50  | 3.00   | Bothma, 1966; Loveridge & Macdonald, 2003                                                           |
| <i>Lutreolina crassicaudata</i>   | 0.70   | 0.05   | Facure & Ramos, 2001; Caseres et al., 2002                                                          |
| <i>Lycalopex culpaeus</i>         | 8.90   | 2.00   | Zapata et al., 2005                                                                                 |
| <i>Lycalopex gymnocercus</i>      | 5.40   | 0.01   | Varela et al., 2008; Castillo et al., 2011                                                          |
| <i>Lycaon pictus</i>              | 27.00  | 50.00  | Creel & Creel, 2002; Courchamp et al., 2002                                                         |
| <i>Lynx lynx</i>                  | 27.00  | 15.00  | Odden et al., 2006                                                                                  |
| <i>Lynx pardinus</i>              | 12.68  | 1.50   | Carbone et al., 2007                                                                                |
| <i>Martes martes</i>              | 1.10   | 0.12   | Clevenger, 1993                                                                                     |
| <i>Martes pennanti</i>            | 4.43   | 0.78   | Carbone et al., 2007                                                                                |
| <i>Meles meles</i>                | 9.37   | 0.03   | Carbone et al., 2007                                                                                |
| <i>Mephitis mephitis</i>          | 3.50   | 0.01   | Azevedo et al., 2005                                                                                |
| <i>Mungos mungo</i>               | 1.44   | 0.01   | Carbone et al., 2007                                                                                |
| <i>Mustela erminea</i>            | 0.27   | 0.05   | Carbone et al., 2007                                                                                |
| <i>Mustela frenata</i>            | 0.15   | 0.02   | Carbone et al., 2007                                                                                |
| <i>Mustela nivalis</i>            | 0.09   | 0.03   | Carbone et al., 2007                                                                                |
| <i>Mustela putorius</i>           | 0.90   | 0.10   | Carbone et al., 2007                                                                                |
| <i>Neovison vison</i>             | 1.20   | 1.30   | Gilbert & Nancekivell, 1981; Valenzuela et al., 2013                                                |
| <i>Nyctereutes procyonoides</i>   | 6.07   | 0.05   | Carbone et al., 2007                                                                                |
| <i>Otocyon megalotis</i>          | 4.20   | 0.001  | Bothma 1966; Klare et al., 2011                                                                     |
| <i>Panthera leo</i>               | 140.50 | 137.25 | Carbone et al., 2007                                                                                |
| <i>Panthera onca</i>              | 69.30  | 31.00  | Schaller & Vasconcelos, 1978; Rabinowitz & Nottigham, 1986; Farrell et al., 2000; de Oliveira, 2002 |
| <i>Panthera pardus</i>            | 42.80  | 23.00  | Johnson et al., 1993; Henschel et al., 2005                                                         |
| <i>Panthera tigris</i>            | 177.25 | 189.25 | Carbone et al., 2007                                                                                |
| <i>Panthera uncia</i>             | 52.00  | 52.00  | Anwar et al., 2011; Chetri et al., 2017                                                             |
| <i>Paradoxurus hermaphroditus</i> | 4.00   | 0.10   | Nakashima et al., 2010                                                                              |
| <i>Philander opossum</i>          | 0.40   | 0.03   | Hershkovitz, 1997; Castro-Arellano et al., 2000                                                     |

---

|                                 |       |       |                                                                                    |
|---------------------------------|-------|-------|------------------------------------------------------------------------------------|
| <i>Procyon lotor</i>            | 6.00  | 0.04  | Schoonover & Marshall, 1951                                                        |
| <i>Proteles cristata</i>        | 8.33  | 0.001 | Carbone et al., 2007                                                               |
| <i>Puma concolor</i>            | 66.50 | 28.70 | Iriarte et al., 1990; Farrell et al., 2000; de Oliveira, 2002; Moreno et al., 2006 |
| <i>Sarcophilus harrisi</i>      | 8.00  | 0.80  | Jones & Barmuta, 1998; Pemberton et al., 2008                                      |
| <i>Speothus venaticus</i>       | 6.00  | 4.00  | Zeurcher et al., 2005; de Souza Lima et al., 2009                                  |
| <i>Urocyon cinereoargenteus</i> | 5.00  | 0.04  | Hockman & Chapman, 1983                                                            |
| <i>Viverra zibethica</i>        | 5.00  | 0.03  | Colon & Sugau, 2012                                                                |
| <i>Viverricula indica</i>       | 2.70  | 0.02  | Chuang & Lee, 1997                                                                 |
| <i>Vulpes cana</i>              | 0.97  | 0.03  | Carbone et al., 2007                                                               |
| <i>Vulpes chama</i>             | 4.00  | 0.01  | Bothma, 1966; Klare et al., 2014                                                   |
| <i>Vulpes lagopus</i>           | 5.20  | 0.05  | Anthony et al., 2000                                                               |
| <i>Vulpes macrotis</i>          | 1.48  | 0.70  | Carbone et al., 2007                                                               |
| <i>Vulpes rueppellii</i>        | 2.40  | 0.02  | Lindsay & MacDonald, 1986                                                          |
| <i>Vulpes velox</i>             | 2.10  | 1.35  | Carbone et al., 2007                                                               |
| <i>Vulpes vulpes</i>            | 8.00  | 0.05  | Sidorovich et al., 2005; Jędrzejewski & Jędrzejewska, 1992                         |

## References S4

- Abreu KC, Moro-Rios RF, Silva-Pereira JE, Miranda JM, Jablonski EF, and Passos FC. 2008. Feeding habits of ocelot (*Leopardus pardalis*) in Southern Brazil. *Mammalian Biology* 73:407-411. 10.1016/j.mambio.2007.07.004
- Andelt WF, Kie JG, Knowlton FF, and Cardwell K. 1987. Variation in coyote diets associated with season and successional changes in vegetation. *Journal of Wildlife Management* 51:273-277.
- Angelici FM. 2000. Food habits and resource partitioning of carnivores (Herpestidae, Viverridae) in the rainforests of southeastern Nigeria: preliminary results. *Revue d'Écologie* 55:67-76.
- Angelici FM, and Luiselli L. 2005. Habitat associations and dietary relationships between two genets, *Genetta maculata* and *Genetta cristata*. *Revue d'Écologie* 60:341-354.
- Anthony RM, Barten NL, and Seiser PE. 2000. Foods of arctic foxes (*Alopex lagopus*) during winter and spring in western Alaska. *Journal of Mammalogy* 81:820-828.
- Anwar MB, Jackson R, Nadeem MS, Janečka JE, Hussain S, Beg MA, Muhammad G, and Qayyum M. 2011. Food habits of the snow leopard *Panthera uncia* (Schreber, 1775) in Baltistan, Northern Pakistan. *European Journal of Wildlife Research* 57:1077-1083. 10.1007/s10344-011-0521-2
- Atkinson RPD, Macdonald DW, and Kamizola R. 2002. Dietary opportunism in side-striped jackals *Canis adustus* Sundevall. *Journal of Zoology* 257:129-139.

- Azevedo F, Lester V, Gorsuch W, Lariviere S, Wirsing A, and Murray D. 2006. Dietary breadth and overlap among five sympatric prairie carnivores. *Journal of Zoology* 269:127-135. 10.1111/j.1469-7998.2006.00075.x
- Baker CM. 1989. Feeding habits of the water mongoose (*Atilax paludinosus*). *Zeitschrift für Säugetierkunde* 54:31-39.
- Belcher CA. 1995. Diet of the tiger quoll (*Dasyurus maculatus*) in East Gippsland, Victoria. *Wildlife Research* 22:341-357.
- Blackhall S. 1980. Diet of the eastern native-cat, *Dasyurus viverrinus* (Shaw), in southern Tasmania. *Wildlife Research* 7:191-197.
- Bothma JdP. 1966. Food of the silver fox *Vulpes chama*. *Zoologica Africana* 2:205-209.
- Braczkowski A, Watson L, Coulson D, Lucas J, Peiser B, and Rossi M. 2012. The diet of caracal, *Caracal caracal*, in two areas of the southern Cape, South Africa as determined by scat analysis. *South African Journal of Wildlife Research* 42:111-116.
- Capitani C, Bertelli I, Varuzza P, Scandura M, and Apollonio M. 2004. A comparative analysis of wolf (*Canis lupus*) diet in three different Italian ecosystems. *Mammalian Biology* 69:1-10.
- Carbone C, Teacher A, Rowcliffe JM. The costs of carnivory. *PLoS Biology* 2007;5(2):e22.
- Cáceres N, Ghizoni-Jr I, and Graipel M. 2002. Diet of two marsupials, *Lutreolina crassicaudata* and *Micoureus demerarae*, in a coastal Atlantic Forest island of Brazil. *Mammalia* 66:331-340.
- Castillo DF, Birochio DE, Lucherini M, and Casanave EB. 2011. Diet of adults and cubs of *Lycalopex gymnocercus* in Pampas grassland: a validation of the Optimal Foraging Theory? *Annales Zoologici Fennici* 48:251-256.
- Castro-Arellano I, Zarza H, and Medellín RA. 2000. *Philander opossum*. *Mammalian Species* 2000:1-8.
- Chetri M, Odden M, and Wegge P. 2017. Snow leopard and Himalayan wolf: food habits and prey selection in the Central Himalayas, Nepal. *PLoS ONE* 12:1-16. 10.1371/journal.pone.0170549
- Chuang SA, and Lee LL. 1997. Food habits of three carnivore species (*Viverricula indica*, *Herpestes urva*, and *Melogale moschata*) in Fushan Forest, northern Taiwan. *Journal of Zoology* 243:71-79.
- Clevenger A. 1993. Pine marten (*Martes martes* Linné, 1758) comparative feeding ecology in an island and mainland population of Spain. *Zeitschrift für Säugetierkunde* 58:212-212.
- Colon CP, and Sugau JB. 2012. Notes on the diet of the Malay civet (*Viverra zangalunga*) and other civets in logged and unlogged lowland dipterocarp rain forests in Sabah, Borneo. *Malayan Nature Journal* 64:69-74.
- Cordero G, and Nicolas R. 1987. Feeding habits of the opossum (*Didelphis marsupialis*) in northern Venezuela. *Fieldiana Zoology*:125-131.
- Courchamp F, Rasmussen GSA, and Macdonald DW. 2002. Small pack size imposes a trade-off between hunting and pup-guarding in the painted hunting dog *Lycaon pictus*. *Behavioral Ecology* 13:20-27. 10.1093/beheco/13.1.20
- Creel S, and Creel NM. 1995. Communal hunting and pack size in African wild dogs, *Lycaon pictus*. *Animal Behaviour* 50:1325-1339.
- Dalerum F, Kunkel K, Angerbjörn A, and Shults BS. 2009. Diet of wolverines (*Gulo gulo*) in the western Brooks Range, Alaska. *Polar Research* 28:246-253. 10.1111/j.1751-8369.2008.00090.x
- de Oliveira T. 2002. Ecología comparativa de la alimentación del jaguar y del puma en el neotrópico. In: Medellín RA, Equihua C, Chetkiewicz C, Crawshaw Jr P, Rabinowitz A, Redford K, Robinson J, Sanderson E, and Taber A, eds. *El jaguar en el nuevo milenio*. Mexico City: Fondo de Cultura Económica, 265-288.

- de Souza Lima E, Jorge RSP, and Dalponte JC. 2009. Habitat use and diet of bush dogs, *Speothos venaticus*, in the Northern Pantanal, Mato Grosso, Brazil. *Mammalia* 73:13-19. 10.1515/MAMM.2009.002
- de Villa Meza A, Martinez Meyer E, and López González C. 2002. Ocelot (*Leopardus pardalis*) food habits in a tropical deciduous forest of Jalisco, Mexico. *American Midland Naturalist* 148:146-154.
- Dollar L, Ganzhorn JU, and Goodman SM. 2007. Primates and other prey in the seasonally variable diet of *Cryptoprocta ferox* in the dry deciduous forest of western Madagascar. In: Gursky SL, and Nekaris KAI, eds. *Primate anti-predator strategies*. Boston: Springer, 63-76.
- Facure KG, and do Nascimento Ramos V. 2011. Food habits of the thick-tailed opossum *Lutreolina crassicaudata* (Didelphimorphia, Didelphidae) in two urban areas of southeastern Brazil. *Mammalian Biology* 76:234-236. 10.1016/j.mambio.2010.06.005
- Farrell LE, Roman J, and Sunkuist ME. 2000. Dietary separation of sympatric carnivores identified by molecular analysis of scats. *Molecular Ecology* 9:1583-1590.
- Gade-Jørgensen I, and Stagegaard R. 2000. Diet composition of wolves *Canis lupus* in east-central Finland. *Acta Theriologica* 45:537-547.
- Galliez M, de Souza Leite M, Queiroz TL, and dos Santos Fernandez FA. 2009. Ecology of the water opossum *Chironectes minimus* in Atlantic forest streams of southeastern Brazil. *Journal of Mammalogy* 90:93-103.
- Giannatos G, Karypidou A, Legakis A, and Polymeni R. 2010. Golden jackal (*Canis aureus* L.) diet in Southern Greece. *Mammalian Biology* 75:227-232. 10.1016/j.mambio.2009.03.003
- Gilbert F, and Nancekivell E. 1982. Food habits of mink (*Mustela vison*) and otter (*Lutra canadensis*) in northeastern Alberta. *Canadian Journal of Zoology* 60:1282-1288.
- Glen A, and Dickman C. 2006. Diet of the spotted-tailed quoll (*Dasyurus maculatus*) in eastern Australia: effects of season, sex and size. *Journal of Zoology* 269:241-248. 10.1111/j.1469-7998.2006.00046.x
- Godsell J. 1983. Ecology of the eastern quoll *Dasyurus viverrinus*, (Dasyruidae: Marsupialia) Doctor of Philosophy. Australian National University.
- Graw B, and Manser M. 2017. Life history patterns and biology of the slender mongoose (*Galerella sanguinea*) in the Kalahari Desert. *Journal of Mammalogy* 98:332-338. 10.1093/jmammal/gyw178
- Hayward M. 2006. Prey preferences of the spotted hyaena (*Crocuta crocuta*) and degree of dietary overlap with the lion (*Panthera leo*). *Journal of Zoology* 270:606-614. 10.1111/j.1469-7998.2006.00183.x
- Hayward M, Hofmeyr M, O'brien J, and Kerley G. 2006. Prey preferences of the cheetah (*Acinonyx jubatus*)(Felidae: Carnivora): morphological limitations or the need to capture rapidly consumable prey before kleptoparasites arrive? *Journal of Zoology* 270:615-627. 10.1111/j.1469-7998.2006.00184.x
- Hayward MW, Lyngdoh S, and Habib B. 2014. Diet and prey preferences of dholes (*Cuon alpinus*): dietary competition within Asia's apex predator guild. *Journal of Zoology* 294:255-266. 10.1111/jzo.12171
- Henschel P, Abernethy K, and White L. 2005. Leopard food habits in the Lopé National Park, Gabon, Central Africa. *African Journal of Ecology* 43:21-28.
- Hershkovitz P. 1997. Composition of the family Didelphidae Gray, 1821 (Didelphoidea: Marsupialia), with a review of the morphology and behavior of the included four-eyed pouched opossums of the genus *Philander* Tiedemann, 1808. *Fieldiana Zoology* 86:1-103.
- Hockman JG, and Chapman JA. 1983. Comparative feeding habits of red foxes (*Vulpes vulpes*) and gray foxes (*Urocyon cinereoargenteus*) in Maryland. *American Midland Naturalist* 110:276-285. 10.2307/2425269

- Holekamp KE, Smale L, Berg R, and Cooper SM. 1997. Hunting rates and hunting success in the spotted hyena (*Crocuta crocuta*). *Journal of Zoology* 242:1-15. 10.1111/j.1469-7998.1997.tb02925.x
- Iriarte JA, Franklin WL, Johnson WE, and Redford KH. 1990. Biogeographic variation of food habits and body size of the America puma. *Oecologia* 85:185-190. 10.1007/BF00319400
- Jędrzejewski W, and Jędrzejewska B. 1992. Foraging and diet of the red fox *Vulpes vulpes* in relation to variable food resources in Białowieża National Park, Poland. *Ecography* 15:212-220. 10.1111/j.1600-0587.1992.tb00027.x
- Johnsingh AJT. 1982. Reproductive and social behaviour of the Dhole, *Cuon alpinus* (Canidae). *Journal of Zoology* 198:443-463. 10.1111/jzo.1982.198.4.443
- Johnson KG, Wei W, Reid DG, and Jinchu H. 1993. Food Habits of Asiatic Leopards (*Panthera pardus fusea*) in Wolong Reserve, Sichuan, China. *Journal of Mammalogy* 74:646-650. 10.2307/1382285
- Jones ME, and Barmuta LA. 1998. Diet overlap and relative abundance of sympatric dasyurid carnivores: a hypothesis of competition. *Journal of Animal Ecology* 67:410-421.
- Kitchen AM, Gese EM, and Schauster ER. 1999. Resource partitioning between coyotes and swift foxes: space, time, and diet. *Canadian Journal of Zoology* 77:1645-1656. 10.1139/z99-143
- Klare U, Kamler JF, and Macdonald DW. 2011. The bat-eared fox: A dietary specialist? *Mammalian Biology* 76:646-650. 10.1016/j.mambio.2011.06.005
- Klare U, Kamler JF, and Macdonald DW. 2014. Seasonal diet and numbers of prey consumed by Cape foxes *Vulpes chama* in South Africa. *Wildlife Biology* 20:190-195. 10.2981/wlb.00006
- Koskela A, Kojola I, Aspi J, and Hyvärinen M. 2013. The diet of breeding female wolverines (*Gulo gulo*) in two areas of Finland. *Acta Theriologica* 58:199-204. 10.1007/s13364-012-0111-z
- Landa A, Strand O, Swenson JE, and Skogland T. 1997. Wolverines and their prey in southern Norway. *Canadian Journal of Zoology* 75:1292-1299. 10.1139/z97-153
- Lanszki J, and Heltai M. 2002. Feeding habits of golden jackal and red fox in south-western Hungary during winter and spring. *Mammalian Biology* 67:129-136. 10.1078/1616-5047-00020
- Lindsay IM, and Macdonald DW. 1986. Behaviour and ecology of the Ruppell's fox, *Vulpes ruppelli*, in Oman. *Mammalia* 50:461-474. <https://doi.org/10.1515/mamm.1986.50.4.461>
- Loveridge AJ, and Macdonald DW. 2003. Niche separation in sympatric jackals (*Canis mesomelas* and *Canis adustus*). *Journal of Zoology* 259:143-153. 10.1017/S0952836902003114
- Marshall LG. 1978. *Chironectes minimus*. *Mammalian Species*:1-6. 10.2307/0.109.1
- McShane TO, and Grettenberger JF. 1984. Food of the golden jackal (*Canis aureus*) in central Niger. *African Journal of Ecology* 22:49-53. 10.1111/j.1365-2028.1984.tb00673.x
- Melville HIAS, Bothma JdP, and Mills MGL. 2004. Prey selection by caracal in the Kgalagadi Transfrontier Park. *South African Journal of Wildlife Research* 34:67-75.
- Moreno RS, Kays RW, and Samudio R, Jr. 2006. Competitive release in diets of ocelot (*Leopardus pardalis*) and puma (*Puma concolor*) after jaguar (*Panthera onca*) decline. *Journal of Mammalogy* 87:808-816. 10.1644/05-mamm-a-360r2.1

- Motta-Junior JC, Talamoni SA, Lombardi JA, and Simokomaki K. 1996. Diet of the maned wolf, *Chrysocyon brachyurus*, in central Brazil. *Journal of Zoology* 240:277-284. 10.1111/j.1469-7998.1996.tb05284.x
- Nakashima, Y. and Sukor, J.A., 2010. Importance of common palm civets (*Paradoxurus hermaphroditus*) as a long-distance disperser for large-seeded plants in degraded forests. *Tropics*, 18(4), pp.221-229.
- Newsome A, Corbett L, Catling P, and Burt R. 1983. The feeding ecology of the dingo. 1. Stomach contents from trapping in south-eastern Australia, and the non-target wildlife also caught in dingo traps. *Wildlife Research* 10:477-486. 10.1071/WR9830477
- Oakwood M. 1997. The ecology of the northern quoll, *Dasyurus hallucatus* Doctor of Philosophy. Australian National University.
- Odden J, Linnell JDC, and Andersen R. 2006. Diet of Eurasian lynx, *Lynx lynx*, in the boreal forest of southeastern Norway: the relative importance of livestock and hares at low roe deer density. *European Journal of Wildlife Research* 52:237-244. 10.1007/s10344-006-0052-4
- Palmer R, and Fairall N. 1988. Caracal and African wild cat diet in the Karoo National Park and the implications thereof for hyrax. *South African Journal of Wildlife Research* 18:30-34.
- Paltridge R. 2002. The diets of cats, foxes and dingoes in relation to prey availability in the Tanami Desert, Northern Territory. *Wildlife Research* 29:389-403. 10.1071/WR00010
- Pemberton DA, Gales SB, B, Gales R, Lazenby B, and Medlock K. 2008. The diet of the Tasmanian Devil, *Sarcophilus harrisii*, as determined from analysis of scat and stomach contents. *Papers and Proceedings of the Royal Society of Tasmania* 142:13-22. 10.26749/rstpp.142.2.13
- Pollock A. 1999. Notes on status, distribution and diet of northern quoll *Dasyurus hallucatus* in the Mackay-Bowen area, mideastern Queensland. *Australian Zoologist* 31:388-395.
- Rabinowitz AR, and Nottingham Jr BG. 1986. Ecology and behaviour of the Jaguar (*Panthera onca*) in Belize, Central America. *Journal of Zoology* 210:149-159. 10.1111/j.1469-7998.1986.tb03627.x
- Reed JE, Ballard WB, Gipson PS, Kelly BT, Krausman PR, Wallace MC, and B. WD. 2006. Diets of free-ranging Mexican gray wolves in Arizona and New Mexico. *Wildlife Society Bulletin* 34:1127-1133. 10.2193/0091-7648(2006)34[1127:dofmgw]2.0.co;2
- Schaller GB, and Vasconcelos JMC. 1978. Jaguar predation on capybara. *Zeitschrift für Säugetierkunde* 43:296-301.
- Schoonover LJ, and Marshall WH. 1951. Food habits of the raccoon (*Procyon lotor hirtus*) in north-central Minnesota. *Journal of Mammalogy* 32:422-428. 10.2307/1375790
- Sidorovich VE, Sidorovich AA, and Izotova IV. 2006. Variations in the diet and population density of the red fox *Vulpes vulpes* in the mixed woodlands of northern Belarus. *Mammalian Biology* 71:74-89. 10.1016/j.mambio.2005.12.001
- Sillero-Zubiri C, and Gottelli D. 1994. *Canis simensis*. *Mammalian Species*:1-6. 10.2307/3504136
- Soderquist T, and Serena M. 1994. Dietary niche of the western quoll, *Dasyurus geoffroyi*, in the jarrah forest of Western Australia. *Australian Mammalogy* 17:133-136.
- Stenglein JL, Waits LP, Ausband DE, Zager P, and Mack CM. 2011. Estimating gray wolf pack size and family relationships using noninvasive genetic sampling at rendezvous sites. *Journal of Mammalogy* 92:784-795. 10.1644/10-mamm-a-200.1
- Tófoli C, Rohe F, and Setz E. 2009. Jaguarundi (*Puma yagouaroundi*) (Geoffroy, 1803) (Carnivora, Felidae) food habits in a mosaic of Atlantic Rainforest and eucalypt plantations of southeastern Brazil. *Brazilian Journal of Biology* 69:871-877. 10.1590/S1519-69842009000400015

- Valenzuela AEJ, Raya Rey A, Fasola L, Sáenz Samaniego RA, and Schiavini A. 2013. Trophic ecology of a top predator colonizing the southern extreme of South America: Feeding habits of invasive American mink (*Neovison vison*) in Tierra del Fuego. *Mammalian Biology* 78:104-110. 10.1016/j.mambio.2012.11.007
- Varela O, Cormenzana-Méndez A, Krapovickas L, and Bucher EH. 2008. Seasonal diet of the Pampas fox (*Lycalopex gymnocercus*) in the Chaco dry woodland, northwestern Argentina. *Journal of Mammalogy* 89:1012-1019. 10.1644/07-mamm-a-125.1
- Whitehouse SJO. 1977. The diet of the dingo in Western Australia. *Wildlife Research* 4:145-150. 10.1071/WR9770145
- Zapata SC, Travaini A, Delibes M, and Martínez-Peck R. 2005. Food habits and resource partitioning between grey and culpeo foxes in southeastern Argentine Patagonia. *Studies on Neotropical Fauna and Environment* 40:97-103. 10.1080/01650520500129836
- Zuercher GL, Gipson PS, and Carrillo O. 2005. Diet and habitat associations of bush dogs *Speothos venaticus* in the Interior Atlantic Forest of eastern Paraguay. *Oryx* 39:86-89. 10.1017/S0030605305000153

## S5: Comparison of thylacine body mass estimates.

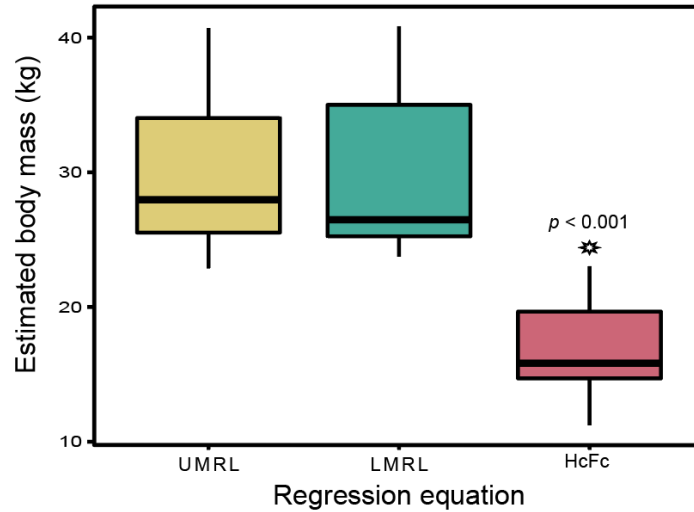

**Figure S5:** Wilcoxon ranked-sum test of body mass estimates via Myers (2001) dental UMRL/LMRL regressions and Campione & Evans (2012) stylopodial circumference regressions ( $n = 19$ ). Abbreviations as in text.

## References S5

- Campione NE, and Evans DC. 2012. A universal scaling relationship between body mass and proximal limb bone dimensions in quadrupedal terrestrial tetrapods. *BMC Biology* 10:1.
- Myers TJ. 2001. Prediction of marsupial body mass. *Australian Journal of Zoology* 49:99-118.



**Table S6:** Body mass regression and volumetric methods comparison. Abbreviations as in text. Density values for the low ( $\rho = 893.36 \text{ kg/m}^3$ ) and high ( $\rho = 1000.00 \text{ kg/m}^3$ ) estimates follow Sellers et al. (2012) and Alexander (1985), respectively. Estimates marked with an asterisk\* derive from scanned taxidermy mounts. All masses in kilogram

| Specimen   | UMRL<br>$\pm 9\%$ | LMRL<br>$\pm 10\%$ | HcFc<br>$\pm 25\%$ | Convex<br>hull<br>(low) | Convex<br>hull<br>(high) | Volumetric model<br>poor condition<br>(low) | Volumetric model<br>poor condition<br>(high) | Volumetric model<br>ideal condition<br>(low) | Volumetric model<br>ideal condition<br>(high) |
|------------|-------------------|--------------------|--------------------|-------------------------|--------------------------|---------------------------------------------|----------------------------------------------|----------------------------------------------|-----------------------------------------------|
| NMV C28178 | 22.87             | 23.91              | 11.24              | 9.50                    | 10.64                    | 10.75                                       | 12.03                                        | 12.26                                        | 13.73                                         |
| NMV C28744 | —                 | —                  | —                  | —                       | —                        | —                                           | —                                            | 13.69*                                       | 15.32*                                        |
| NRM 566599 | 25.05             | 24.85              | 14.77              | 13.27                   | 14.85                    | 7.99                                        | 8.95                                         | —                                            | —                                             |
| TMAG A1298 | —                 | —                  | —                  | —                       | —                        | —                                           | —                                            | 20.32*                                       | 22.75*                                        |
| TMAG A312  | 26.00             | 23.76              | 15.58              | 14.23                   | 15.93                    | 18.23                                       | 20.41                                        | 20.73                                        | 23.20                                         |
| TMAG A315  | 36.16             | 37.79              | 23.02              | 19.71                   | 22.07                    | 23.86                                       | 26.70                                        | 27.30                                        | 30.56                                         |

S

## References S6

- Alexander RM. 1985. Mechanics of posture and gait of some large dinosaurs. *Zoological Journal of the Linnean Society* 83:1-25. [10.1111/j.1096-3642.1985.tb00871.x](https://doi.org/10.1111/j.1096-3642.1985.tb00871.x)
- Sellers WI, Hepworth-Bell J, Falkingham PL, Bates KT, Brassey CA, Egerton VM, and Manning PL. 2012. Minimum convex hull mass estimations of complete mounted skeletons. *Biology Letters* 8:842-845. [doi:10.1098/rsbl.2012.0263](https://doi.org/10.1098/rsbl.2012.0263)

## S7: Linear metrics

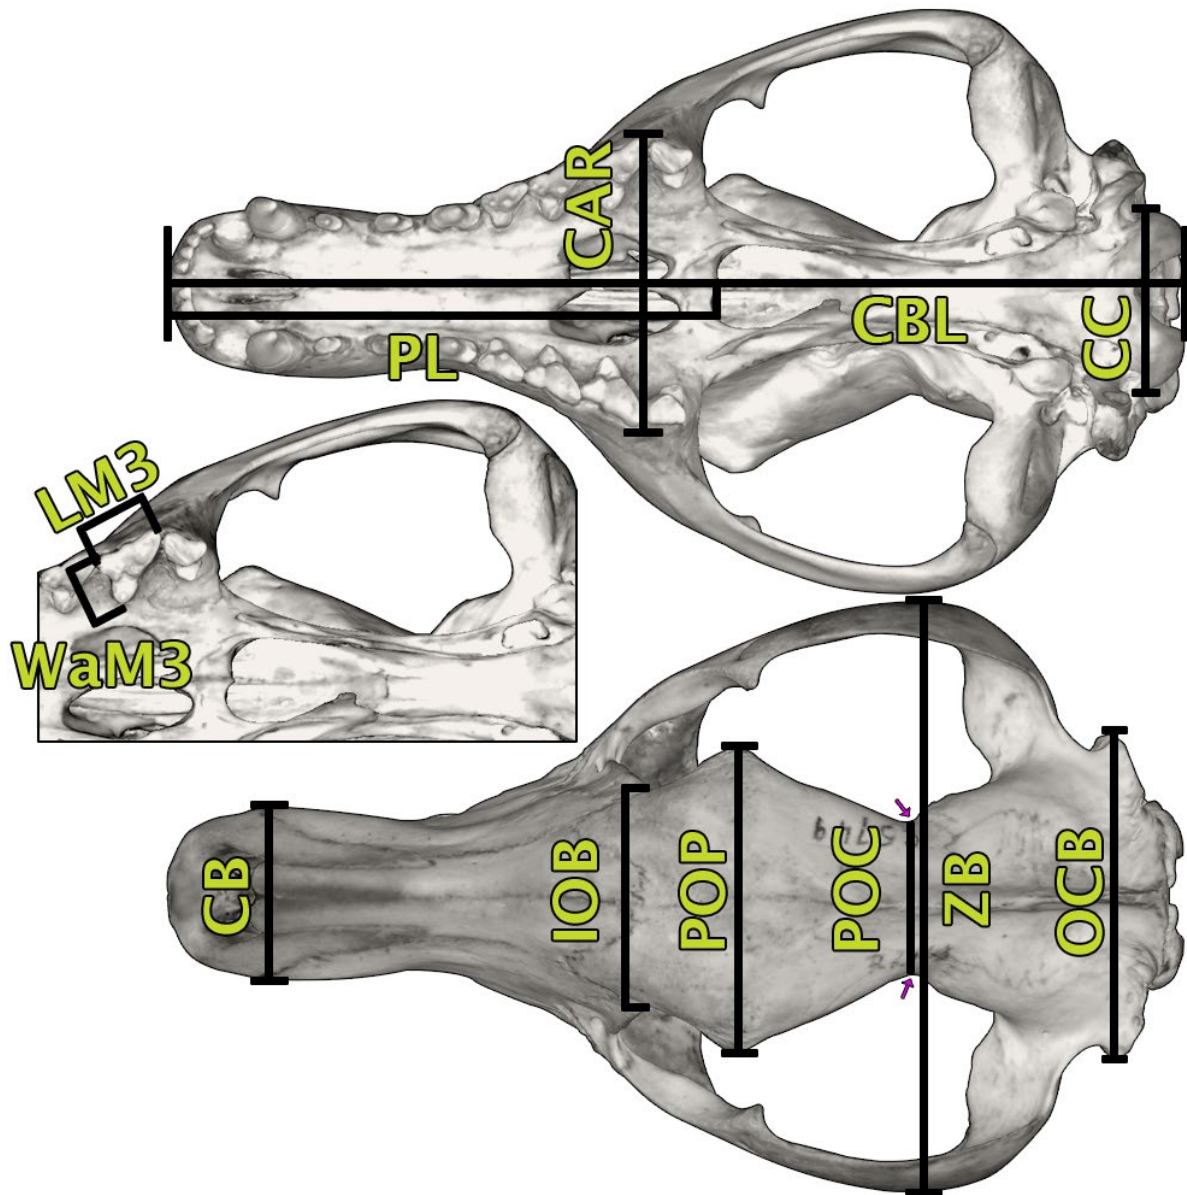

**Figure S7:** Cranial linear metric explanations. CAR = breadth across the carnassials; CB = breadth across the canines; CBL = condylobasal length; CC = breadth across the occipital condyles; IOB = interorbital breadth; LM3 = length of M<sup>3</sup>; OCB = occipital breadth; PL = palatal length; POC = width across the postorbital constriction; POP = breadth across the postorbital processes of the frontal; WaM3 = greatest anterior width of the M<sup>3</sup>; ZB = zygomatic breadth.

**Table S7:** Thylacine craniodental linear metrics. Abbreviations as in Fig. S7; all metrics in millimetres. Specimen UMZC A6.7/3 listed as unknown sex.

| Specimen             | Sex | CBL   | CC   | CAR  | PL    | CB   | IOB  | POP  | POC  | ZB    | OCB  | LM3  | WaM3 |
|----------------------|-----|-------|------|------|-------|------|------|------|------|-------|------|------|------|
| NHMUK ZD 39.6.11.3   | F   | 194.5 | 34.0 | 58.4 | 108.7 | 32.4 | 41.6 | 61.7 | 32.9 | 110.2 | 58.4 | 13.8 | 10.7 |
| NHMUK ZD 52.1.16.7   | F   | 196.3 | 32.8 | 60.3 | 107.4 | 32.9 | 42.8 | 62.9 | 33.0 | 114.0 | 61.3 | 14.2 | 10.9 |
| NHMUK ZD 52.1.16.8   | F   | 191.2 | 32.7 | 59.4 | 101.4 | 31.2 | 39.0 | 56.9 | 33.2 | 104.5 | 58.1 | 14.5 | 11.2 |
| NHMUK ZD 72.666      | F   | 197.7 | 33.5 | 61.9 | 105.0 | 32.1 | 43.8 | 64.4 | 35.3 | 113.3 | 61.8 | 14.6 | 11.4 |
| NHMUK ZD 93.4.13.1   | F   | 205.6 | 35.4 | 61.5 | 110.3 | 34.9 | 40.6 | 58.9 | 33.3 | 114.2 | 63.4 | 15.5 | 11.7 |
| USNM 124662          | F   | 207.0 | 32.7 | 61.0 | 113.2 | 33.7 | 43.4 | 63.2 | 34.9 | 111.0 | 63.8 | 14.5 | 11.2 |
| NMV C 5742           | F   | 202.8 | 33.7 | 60.1 | 110.4 | 34.3 | 42.0 | 63.6 | 33.9 | 109.9 | 62.1 | 14.6 | 11.4 |
| NMV C 5748.1         | F   | 188.3 | 32.7 | 58.1 | 103.4 | 31.6 | 38.6 | 55.9 | 34.8 | 104.0 | 58.1 | 13.8 | 10.2 |
| NMV C 5750.1         | F   | 183.7 | 33.1 | 57.4 | 101.2 | 32.0 | 37.5 | 55.9 | 32.8 | 102.7 | 57.3 | 13.5 | 10.7 |
| NRM 566599           | F   | 201.4 | 33.4 | 59.7 | 108.8 | 33.0 | 45.5 | 65.2 | 34.1 | 111.8 | 60.3 | 13.6 | 10.7 |
| SAM M M 1959         | F   | 209.6 | 35.0 | 62.8 | 112.4 | 35.7 | 46.9 | 65.8 | 36.1 | 116.6 | 64.9 | 15.9 | 12.3 |
| SAM M M 922          | F   | 185.9 | 33.2 | 56.1 | 107.3 | 30.2 | 42.3 | 62.5 | 35.0 | 107.7 | 59.4 | 13.5 | 10.6 |
| UMZC A6.7/8          | F   | 202.5 | 34.1 | 60.2 | 107.1 | 33.6 | 41.4 | 62.4 | 34.7 | 111.1 | 61.9 | 14.5 | 10.8 |
| ZMB MAM 4269         | F   | 182.3 | 32.0 | 56.1 | 102.1 | 29.7 | 39.3 | 59.8 | 33.1 | 103.0 | 55.6 | 12.7 | 9.7  |
| AM M 19465           | M   | 226.2 | 36.5 | 65.2 | 119.0 | 37.6 | 46.8 | 65.9 | 35.7 | 125.7 | 71.7 | 15.0 | 12.0 |
| AMNH 144316          | M   | 245.7 | 39.2 | 67.1 | 128.4 | 43.2 | 51.8 | 73.0 | 36.0 | 140.8 | 77.0 | 15.6 | 12.8 |
| AMNH 35244           | M   | 224.3 | 37.4 | 65.9 | 118.5 | 37.3 | 49.5 | 71.4 | 35.7 | 129.1 | 69.4 | 15.6 | 12.3 |
| NHMUK ZD 1963.8.30.1 | M   | 234.4 | 36.6 | 67.4 | 125.8 | 40.8 | 51.7 | 72.6 | 35.7 | 139.5 | 70.4 | 16.1 | 12.4 |
| NHMUK ZD 46.4.4.1    | M   | 230.5 | 37.0 | 68.5 | 123.6 | 40.2 | 52.3 | 77.6 | 35.8 | 139.5 | 73.5 | 15.4 | 11.7 |
| NHMUK ZD 72.665      | M   | 225.2 | 38.8 | 63.3 | 120.2 | 37.9 | 45.8 | 65.0 | 34.7 | 124.5 | 69.8 | 15.4 | 12.2 |
| NHMUK ZD 83.8.22.1   | M   | 221.4 | 34.8 | 67.4 | 114.6 | 38.7 | 48.3 | 68.5 | 34.6 | 132.4 | 72.5 | 15.9 | 12.0 |
| USNM 155407          | M   | 211.0 | 34.6 | 62.8 | 113.7 | 36.0 | 47.5 | 68.6 | 35.5 | 121.2 | 65.4 | 14.2 | 11.5 |
| NMV C 5746.1         | M   | 232.2 | 37.1 | 66.9 | 126.0 | 40.5 | 48.7 | 70.4 | 35.4 | 132.9 | 73.2 | 16.4 | 12.9 |
| NMV C 5749           | M   | 229.1 | 40.5 | 67.3 | 124.8 | 39.1 | 48.8 | 68.5 | 34.4 | 132.5 | 73.3 | 16.2 | 12.3 |
| SAM M 1953           | M   | 243.5 | 40.0 | 66.9 | 132.1 | 41.6 | 54.3 | 77.0 | 36.7 | 142.7 | 74.7 | 15.5 | 12.0 |
| SAM M 95             | M   | 245.4 | 37.9 | 68.1 | 134.7 | 42.1 | 52.0 | 75.7 | 35.4 | 143.5 | 75.2 | 16.0 | 12.5 |
| SMNS Z-MAM 2019      | M   | 224.4 | 35.3 | 64.3 | 119.0 | 38.6 | 49.4 | 69.7 | 33.5 | 136.9 | 71.4 | 14.7 | 11.3 |

|                        |   |       |      |      |       |      |      |      |      |       |      |      |      |
|------------------------|---|-------|------|------|-------|------|------|------|------|-------|------|------|------|
| TMAG 321               | M | 252.6 | 40.2 | 70.5 | 131.9 | 44.3 | 56.4 | 78.4 | 36.8 | 149.4 | 79.8 | 16.4 | 13.0 |
| ZMB MAM 2986           | M | 208.9 | 37.4 | 62.6 | 113.3 | 34.3 | 45.1 | 63.8 | 33.7 | 116.6 | 65.3 | 14.8 | 12.4 |
| ZMB MAM 47902          | M | 221.0 | 36.2 | 63.7 | 117.8 | 37.3 | 49.5 | 71.5 | 34.9 | 126.1 | 68.9 | 14.5 | 12.0 |
| AM M 1821              | U | 224.0 | 33.8 | 64.2 | 117.1 | 35.8 | 49.1 | 72.0 | 38.0 | 118.8 | 66.5 | 15.5 | 12.3 |
| AM M 27836             | U | 191.1 | 32.5 | 60.0 | 101.6 | 32.2 | 39.1 | 57.4 | 32.9 | 107.0 | 59.6 | 14.0 | 10.9 |
| AM M 401               | U | 250.0 | 41.1 | 71.9 | 134.4 | 44.6 | 54.8 | 77.9 | 37.2 | 149.3 | 79.2 | 17.2 | 13.0 |
| AM M 402               | U | 194.5 | 33.0 | 58.9 | 105.0 | 32.5 | 40.6 | 61.1 | 33.3 | 108.3 | 59.3 | 14.1 | 10.9 |
| AM M 763               | U | 247.5 | 39.1 | 71.0 | 130.3 | 43.0 | 56.0 | 78.6 | 38.2 | 146.2 | 77.3 | 16.6 | 12.3 |
| AM M 768               | U | 228.3 | 37.7 | 66.8 | 122.6 | 41.6 | 49.1 | 69.6 | 35.7 | 137.5 | 72.8 | 15.5 | 11.9 |
| AM M 769               | U | 229.3 | 38.3 | 68.8 | 118.2 | 39.2 | 46.9 | 64.4 | 35.0 | 131.5 | 72.8 | 15.6 | 12.4 |
| AM M 771               | U | 192.0 | 35.4 | 61.3 | 102.1 | 32.4 | 41.9 | 61.3 | 33.4 | 113.1 | 60.6 | 14.5 | 11.1 |
| AMNH 146829            | U | 205.1 | 34.3 | 61.2 | 109.6 | 34.7 | 43.1 | 64.6 | 35.9 | 110.0 | 61.2 | 15.2 | 11.3 |
| AMNH 35866             | U | 207.2 | 35.0 | 62.2 | 110.6 | 35.1 | 44.7 | 64.8 | 34.7 | 115.7 | 65.4 | 15.2 | 11.2 |
| LEEDM C.1869.46.2.4088 | U | 246.1 | 36.4 | 70.6 | 127.9 | 42.2 | 53.8 | 76.9 | 37.8 | 139.2 | 75.4 | 17.6 | 13.8 |
| LEEDM C.1869.46.4.4087 | U | 232.1 | 40.3 | 68.3 | 122.9 | 40.6 | 49.6 | 71.6 | 34.7 | 133.8 | 74.7 | 16.9 | 13.1 |
| LEEDM C.1869.46.5.4091 | U | 227.4 | 38.1 | 65.1 | 117.3 | 38.4 | 47.0 | 65.4 | 35.0 | 130.4 | 72.5 | 15.7 | 12.1 |
| NHM 1002               | U | 201.5 | 34.2 | 61.0 | 107.8 | 33.4 | 42.5 | 61.2 | 33.7 | 112.6 | 63.1 | 14.0 | 10.7 |
| NMW 19.330.46          | U | 190.9 | 32.8 | 58.2 | 102.2 | 30.5 | 39.4 | 59.7 | 33.4 | 104.0 | 61.0 | 14.3 | 10.7 |
| NMW 27.409.9           | U | 192.0 | 32.8 | 58.9 | 103.0 | 32.0 | 37.3 | 55.5 | 31.7 | 103.2 | 60.7 | 14.6 | 11.2 |
| QVM 1962:1:54          | U | 187.3 | 33.5 | 59.6 | 99.2  | 31.3 | 39.1 | 58.9 | 34.6 | 108.8 | 62.1 | 13.8 | 10.9 |
| QVM 1962:1:57          | U | 194.1 | 33.1 | 57.9 | 103.0 | 31.9 | 41.7 | 63.9 | 34.7 | 106.5 | 59.6 | 13.5 | 10.7 |
| RBINS 31.Z             | U | 237.0 | 36.2 | 67.3 | 125.8 | 39.3 | 49.1 | 68.8 | 35.4 | 130.2 | 71.8 | 16.4 | 13.0 |
| RBINS 32               | U | 207.3 | 36.3 | 61.0 | 111.7 | 33.7 | 42.9 | 64.0 | 36.1 | 114.2 | 63.3 | 14.9 | 10.9 |
| RBINS 32.B             | U | 197.7 | 35.1 | 60.3 | 105.7 | 32.9 | 39.7 | 60.5 | 34.6 | 101.2 | 61.2 | 14.8 | 11.3 |
| SAM M 1955             | U | 234.1 | 37.4 | 68.0 | 126.4 | 41.3 | 51.6 | 73.5 | 36.6 | 140.7 | 72.4 | 15.0 | 12.5 |
| SAM M 1960             | U | 210.0 | 34.4 | 61.3 | 114.9 | 34.7 | 44.6 | 65.4 | 33.2 | 117.2 | 63.5 | 14.1 | 11.4 |
| TMAG 1238              | U | 212.5 | 34.5 | 60.1 | 112.6 | 35.3 | 47.3 | 69.5 | 36.4 | 115.3 | 63.9 | 14.8 | 11.3 |
| TMAG 1242              | U | 205.4 | 34.8 | 61.1 | 107.8 | 33.3 | 41.9 | 59.8 | 34.5 | 113.0 | 61.5 | 14.2 | 11.6 |
| TMAG 1244              | U | 240.4 | 38.8 | 63.8 | 125.4 | 39.3 | 51.3 | 75.1 | 36.6 | 138.8 | 73.1 | 14.9 | 12.4 |
| TMAG 1276              | U | 210.3 | 35.3 | 59.7 | 110.1 | 34.4 | 44.6 | 63.4 | 35.4 | 113.3 | 64.4 | 13.9 | 12.0 |

|              |    |       |      |      |       |      |      |      |      |       |      |      |      |
|--------------|----|-------|------|------|-------|------|------|------|------|-------|------|------|------|
| TMAG 244     | U  | 234.7 | 38.2 | 65.4 | 119.5 | 37.4 | 48.2 | 71.1 | 37.1 | 122.5 | 71.4 | 16.0 | 12.6 |
| TMAG 295     | U  | 197.3 | 35.3 | 59.9 | 105.5 | 34.0 | 41.7 | 61.8 | 35.6 | 109.4 | 61.0 | 14.3 | 10.5 |
| TMAG 297     | U  | 222.5 | 37.2 | 63.1 | 121.1 | 37.4 | 49.1 | 68.6 | 37.2 | 125.5 | 68.3 | 14.8 | 12.1 |
| TMAG 890     | U  | 228.6 | 35.5 | 67.0 | 120.2 | 39.9 | 48.7 | 70.5 | 36.4 | 130.8 | 71.0 | 15.9 | 13.0 |
| UMZC A6.7/19 | U  | 234.5 | 37.3 | 70.2 | 122.9 | 42.2 | 50.8 | 73.2 | 37.1 | 136.9 | 72.2 | 16.7 | 12.5 |
| UMZC A6.7/3  | U* | 189.6 | 33.1 | 58.7 | 102.0 | 30.8 | 39.2 | 57.7 | 34.5 | 104.9 | 58.0 | 13.7 | 10.8 |
| WAM M 195    | U  | 213.4 | 37.3 | 66.1 | 110.2 | 35.8 | 42.9 | 61.7 | 33.7 | 125.0 | 69.4 | 14.7 | 12.6 |

## S8: 3D Geometric Morphometric (3D GM) landmarks

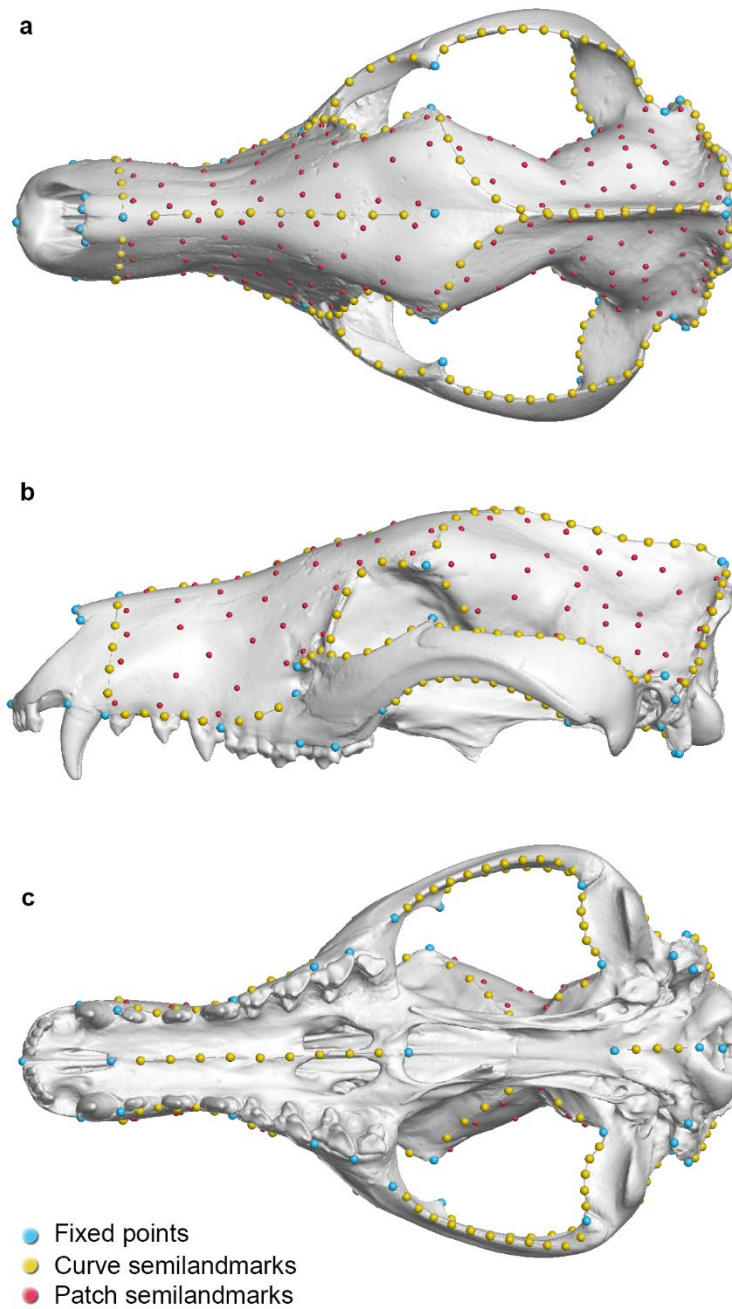

**Figure S8:** Landmark and semilandmark template set. Fixed points (blue) generally anchor curves, with some minima/maxima or functional sets (e.g., mesial and distal limits of the maxillary carnassial). For definitions, see **Table S8**.

**Table S8:** 3D GM landmark protocol and definitions.

| Point | Definition                                                   | Type  | Paired | Semi-landmarks |
|-------|--------------------------------------------------------------|-------|--------|----------------|
| 1     | Anterionmost extent of premaxilla at midline (Prosthion)     | Fixed | -      | -              |
| 2     | Anterionmost nasal (L)                                       | Fixed | yes    | -              |
| 3     | Anterionmost nasal (R)                                       | Fixed | yes    | -              |
| 4     | Anterior nasopremaxilla (L)                                  | Fixed | yes    | -              |
| 5     | Anterior nasopremaxilla (R)                                  | Fixed | yes    | -              |
| 6     | Mesial canine alveolar margin in lateral view (L)            | Fixed | yes    | -              |
| 7     | Mesial canine alveolar margin in lateral view (R)            | Fixed | yes    | -              |
| 8     | Distal canine alveolar margin in lateral view (L)            | Fixed | yes    | -              |
| 9     | Distal canine alveolar margin in lateral view (R)            | Fixed | yes    | -              |
| 10    | Midline at point coplanar with & dorsal to 8/9               | Fixed | -      | -              |
| 11    | Midline at posterior edge of incisive foramen                | Fixed | -      | -              |
| 12    | Distal alveolar margin of P3 in lateral view (L)             | Fixed | yes    | -              |
| 13    | Distal alveolar margin of P3 in lateral view (R)             | Fixed | yes    | -              |
| 14    | Dorsal border of infraorbital foramen (L)                    | Fixed | yes    | -              |
| 15    | Dorsal border of infraorbital foramen (R)                    | Fixed | yes    | -              |
| 16    | Ventral border of infraorbital foramen (L)                   | Fixed | yes    | -              |
| 17    | Ventral border of infraorbital foramen (R)                   | Fixed | yes    | -              |
| 18    | Mesial alveolar margin of carnassial in lateral view (L)     | Fixed | yes    | -              |
| 19    | Mesial alveolar margin of carnassial in lateral view (R)     | Fixed | yes    | -              |
| 20    | Distal alveolar margin of carnassial in lateral view (L)     | Fixed | yes    | -              |
| 21    | Distal alveolar margin of carnassial in lateral view (R)     | Fixed | yes    | -              |
| 22    | Postorbital process (L)                                      | Fixed | yes    | -              |
| 23    | Postorbital process (R)                                      | Fixed | yes    | -              |
| 24    | Midline at point in line with 22/23                          | Fixed | -      | -              |
| 25    | Postorbital process of zygomatic (R)                         | Fixed | yes    | -              |
| 26    | Postorbital process of zygomatic (L)                         | Fixed | yes    | -              |
| 27    | Ventrodiscal inflection of jugal with maxilla (R)            | Fixed | yes    | -              |
| 28    | Ventrodiscal inflection of jugal with maxilla (L)            | Fixed | yes    | -              |
| 29    | Midline at distalmost interpalatine                          | Fixed | -      | -              |
| 30    | Anterolateral point of glenoid on squamosal (L)              | Fixed | yes    | -              |
| 31    | Anterolateral point of glenoid on squamosal (R)              | Fixed | yes    | -              |
| 32    | Anteromedial point of glenoid on squamosal (L)               | Fixed | yes    | -              |
| 33    | Anteromedial point of glenoid on squamosal (R)               | Fixed | yes    | -              |
| 34    | Midline of basicranium at anterior extent of auditory bullae | Fixed | -      | -              |
| 35    | Posterior inflection of zygomatic with neurocranium (R)      | Fixed | yes    | -              |
| 36    | Posterior inflection of zygomatic with neurocranium (L)      | Fixed | yes    | -              |
| 37    | Lateralmost point of nuchal crest (R)                        | Fixed | yes    | -              |
| 38    | Lateralmost point of nuchal crest (L)                        | Fixed | yes    | -              |
| 39    | Ventralmost point of mastoid process (R)                     | Fixed | yes    | -              |
| 40    | Ventralmost point of mastoid process (L)                     | Fixed | yes    | -              |
| 41    | Ventralmost point of paracondylar process (R)                | Fixed | yes    | -              |
| 42    | Ventralmost point of paracondylar process (L)                | Fixed | yes    | -              |
| 43    | Ventral border of foramen magnum at midline (Basion)         | Fixed | -      | -              |
| 44    | Dorsal border of foramen magnum at midline (Opisthion)       | Fixed | -      | -              |

|     |                                                                                |       |     |    |
|-----|--------------------------------------------------------------------------------|-------|-----|----|
| 45  | Confluence of temporal and nuchal crests (R)                                   | Fixed | yes | -  |
| 46  | Confluence of temporal and nuchal crests (L)                                   | Fixed | yes | -  |
| C1  | Curve between points 10 & 26 (dorsum of rostrum)                               | Curve | -   | 9  |
| C2  | Curve between points 11 % 29 (palatal curve)                                   | Curve | -   | 9  |
| C3  | Curve between points 9 & 10 (rostral arc at canine)                            | Curve | -   | 5  |
| C4  | Curve between points 8 & 10 (rostral arc at canine)                            | Curve | -   | 5  |
| C5  | Curve between points 9 & 13 (alveolar margin)                                  | Curve | -   | 5  |
| C6  | Curve between points 8 & 12 (alveolar margin)                                  | Curve | -   | 5  |
| C7  | Curve between points 23 & 25 (orbital rim R)                                   | Curve | -   | 11 |
| C8  | Curve between points 22 & 26 (orbital rim L)                                   | Curve | -   | 11 |
| C9  | Curve between point 15 & anterior rim of orbit (dorsal infraorbital foramen R) | Curve | -   | 3  |
| C10 | Curve between point 14 & anterior rim of orbit (dorsal infraorbital foramen R) | Curve | -   | 3  |
| C11 | Curve between points 17 & 13 (ventral infraorbital foramen R)                  | Curve | -   | 3  |
| C12 | Curve between points 16 & 12 (ventral infraorbital foramen L)                  | Curve | -   | 3  |
| C13 | Curve between points 25 & 35 (dorsal zygomatic border R)                       | Curve | -   | 13 |
| C14 | Curve between points 26 & 36 (dorsal zygomatic border L)                       | Curve | -   | 13 |
| C15 | Curve between points 27 & 31 (ventral zygomatic border R)                      | Curve | -   | 11 |
| C16 | Curve between points 28 & 30 (ventral zygomatic border L)                      | Curve | -   | 11 |
| C17 | Curve between points 31 & 33 (anterior border of glenoid R)                    | Curve | -   | 5  |
| C18 | Curve between points 30 & 32 (anterior border of glenoid L)                    | Curve | -   | 5  |
| C19 | Curve between points 34 & 43 (basicranial curve)                               | Curve | -   | 3  |
| C20 | Curve between 22 & 46 (temporal crest L)                                       | Curve | -   | 13 |
| C21 | Curve between 23 & 45 (temporal crest R)                                       | Curve | -   | 13 |
| C22 | Curve between 38 & 46 (nuchal crest L)                                         | Curve | -   | 9  |
| C23 | Curve between 37 & 45 (nuchal crest R)                                         | Curve | -   | 9  |
| C24 | Curve between 22 & 32 (infratemporal crest L)                                  | Curve | -   | 7  |
| C25 | Curve between 23 & 33 (infratemporal crest R)                                  | Curve | -   | 7  |
| P1  | Patch bordered by c1, c3, c5, c7, c9, c11 (rostral patch R)                    | Patch | -   | 36 |
| P2  | Patch bordered by c1, c4, c6, c8, c10, c12 (rostral patch L)                   | Patch | -   | 36 |
| P3  | Patch bordered by c21, c23, c25 (neurocranial patch R)                         | Patch | -   | 36 |
| P4  | Patch bordered by c20, c22, c24 (neurocranial patch L)                         | Patch | -   | 36 |

The meshes were initially imported into Geomagic Studio 2014. They were aligned to a horizontal plane defined by the dorsalmost point of the right external auditory meatus and the ventralmost point of the left and right orbital rim ( $\approx$  Frankfurt horizontal), and a sagittal plane. These oriented meshes were then imported into Viewbox 4 for landmarking.

Several points and curves were defined and placed relative to these planes (e.g., the anterior rostral curves are perpendicular to the horizontal and sagittal plane at the level of the mesial canine alveolus). Fixed points were generally used to define limits for curves, and curves generally used to define limits for the facial and neurocranial patches, with some exceptions (e.g., the zygomatic arches).

A single specimen was used as a reference template on which all landmarks were manually placed. Each subsequent specimen was landmarked with fixed points and curve semilandmarks, which were



then used to transpose and place the patch points via thin spline deformation. Once all specimens were fully landmarked, a mean landmark shape was calculated from the full specimen list and used as a reference set for the sliding procedure. Using the Batch Processing function of Viewbox 4, semilandmarks were allowed to slide to minimise bending energy in relation to this reference set, then projected back upon the mesh surface six times, with each repetition resulting in lesser bending energy. After all specimens completed this procedure, this new set of landmarks and slid semilandmarks was used to calculate a mean landmark shape, and the semilandmarks again slid to this reference and projected onto their respective meshes six times. This iterative procedure was itself performed a total of six times, after which the landmarks are considered homologous.

## S9: Corrected body mass regression equations

**Table S9:** Body mass equations ranked by adjusted R<sup>2</sup> value.

| Regression | Equation                                        | SE       | Adjusted R <sup>2</sup> | PPE     |
|------------|-------------------------------------------------|----------|-------------------------|---------|
| cCBL       | $\ln \text{Body mass} = 2.2396(\ln x) - 9.2149$ | 1.001738 | 0.8188                  | 0.04743 |
| cUMRL      | $\ln \text{Body mass} = 3.0549(\ln x) - 8.9161$ | 1.004586 | 0.7236                  | 0.08608 |
| cLMRL      | $\ln \text{Body mass} = 2.2396(\ln x) - 8.7165$ | 1.004958 | 0.7028                  | 0.08384 |

## S10: Estimated thylacine body masses

**Table S10:** Thylacine body mass estimates. All values in kilograms. Abbreviations as in text. Best estimate mass follows ranking in text (cCBL, HcFc, cUMRL, cLMRL) in order of preference.

| Specimen                  | Sex | HcFc<br>± 25% | cUMRL<br>±8.6% | cLMRL<br>±8.4% | cCBL<br>±4.7% | Total<br>min | Total<br>max | Best<br>estimate<br>mass |
|---------------------------|-----|---------------|----------------|----------------|---------------|--------------|--------------|--------------------------|
| AM M 1821                 | U   | NA            | 19.83          | 18.67          | 18.30         | 17.10        | 21.54        | 18.30                    |
| AM M 19465                | M   | NA            | 18.86          | 17.64          | 18.70         | 16.16        | 20.48        | 18.70                    |
| AM M 27836                | U   | NA            | 13.67          | NA             | 12.82         | 12.21        | 14.85        | 12.82                    |
| AM M 401                  | U   | NA            | 23.53          | 23.93          | 23.40         | 21.50        | 25.94        | 23.40                    |
| AM M 402                  | U   | NA            | 13.50          | 14.18          | 13.34         | 12.34        | 15.37        | 13.34                    |
| AM M 763                  | U   | NA            | 22.57          | 22.34          | 22.88         | 20.47        | 24.51        | 22.88                    |
| AM M 767                  | U   | NA            | 21.51          | NA             | 22.24         | 19.66        | 23.36        | 22.24                    |
| AM M 768                  | U   | NA            | 17.92          | 20.18          | 19.09         | 16.38        | 21.87        | 19.09                    |
| AM M 769                  | U   | NA            | 18.65          | 19.55          | 19.28         | 17.04        | 21.19        | 19.28                    |
| AM M 771                  | U   | NA            | 13.33          | 16.01          | 12.96         | 12.18        | 17.35        | 12.96                    |
| AM M 788                  | U   | NA            | 21.51          | 19.02          | 19.21         | 17.43        | 23.36        | 19.21                    |
| AM M 789                  | U   | NA            | 13.93          | 14.85          | 13.90         | 12.73        | 16.10        | 13.90                    |
| AMNH 144316               | M   | NA            | 20.83          | 22.05          | 22.51         | 19.04        | 23.90        | 22.51                    |
| AMNH 146829               | U   | NA            | 14.28          | NA             | 15.02         | 13.05        | 15.73        | 15.02                    |
| AMNH 35244                | M   | 19.09         | 18.86          | 18.41          | 18.35         | 14.32        | 23.86        | 18.35                    |
| AMNH 35866                | U   | 14.68         | 14.55          | 15.54          | 15.37         | 11.01        | 18.35        | 15.37                    |
| AMNH 42259                | U   | 16.74         | NA             | NA             | 18.83         | 12.56        | 20.93        | 18.83                    |
| NHMUK ZD<br>1963.8.30.1   | M   | 19.69         | 21.86          | 20.45          | 20.25         | 14.77        | 24.61        | 20.25                    |
| NHMUK ZD 1972.175         | M   | NA            | 18.86          | 20.00          | NA            | 17.24        | 21.68        | 18.86                    |
| NHMUK ZD 39.6.11.3        | F   | NA            | 13.58          | 14.40          | 13.34         | 12.41        | 15.61        | 13.34                    |
| NHMUK ZD 46.4.4.1         | M   | NA            | 17.21          | 18.41          | 19.51         | 15.73        | 20.44        | 19.51                    |
| NHMUK ZD 52.1.16.7        | F   | NA            | 12.91          | 14.55          | 13.61         | 11.80        | 15.77        | 13.61                    |
| NHMUK ZD 52.1.16.8        | F   | NA            | 13.50          | 15.16          | 12.83         | 12.22        | 16.43        | 12.83                    |
| NHMUK ZD 72.665           | M   | NA            | 18.97          | NA             | 18.52         | 17.34        | 20.60        | 18.52                    |
| NHMUK ZD 72.666           | F   | 12.91         | 14.55          | 14.93          | 13.83         | 9.68         | 16.18        | 13.83                    |
| NHMUK ZD 83.8.22.1        | M   | NA            | 17.31          | NA             | 17.83         | 15.82        | 18.80        | 17.83                    |
| NHMUK ZD 93.4.13.1        | F   | NA            | 15.47          | 17.47          | 15.10         | 14.14        | 18.93        | 15.10                    |
| LEEDM<br>C.1869.46.2.4088 | U   | NA            | 25.78          | 25.16          | 22.59         | 21.52        | 28.00        | 22.59                    |
| LEEDM<br>C.1869.46.4.4087 | U   | NA            | 16.13          | 20.82          | 19.81         | 14.74        | 22.57        | 19.81                    |
| LEEDM<br>C.1869.46.5.4091 | U   | NA            | 19.72          | 18.67          | 18.93         | 17.10        | 21.42        | 18.93                    |
| NHM 1000                  | U   | NA            | 20.05          | 19.73          | 19.68         | 18.08        | 21.78        | 19.68                    |
| NHM 1002                  | U   | NA            | 14.55          | 13.32          | 14.44         | 12.20        | 15.80        | 14.44                    |
| USNM 124662               | F   | 13.79         | 16.13          | 15.16          | 15.33         | 10.34        | 17.52        | 15.33                    |
| USNM 155407               | M   | 17.82         | 16.52          | 15.78          | 16.00         | 13.37        | 22.28        | 16.00                    |
| USNM 38801                | M   | 22.43         | 20.94          | 19.10          | NA            | 16.82        | 28.04        | 22.43                    |
| NMV C 2163.1              | M   | NA            | 16.41          | 17.94          | NA            | 15.00        | 19.44        | 16.41                    |
| NMV C 28178               | U   | 11.24         | 13.58          | 14.33          | NA            | 8.43         | 15.53        | 11.24                    |
| NMV C 5741.2              | F   | 11.12         | NA             | NA             | NA            | 8.34         | 13.90        | 11.12                    |
| NMV C 5742.1              | F   | 13.74         | 15.19          | 15.39          | 14.64         | 10.31        | 17.18        | 14.64                    |
| NMV C 5746.1              | M   | 19.63         | 18.86          | 20.64          | 19.83         | 14.72        | 24.54        | 19.83                    |
| NMV C 5748.1              | F   | NA            | 13.56          | 13.73          | 12.40         | 11.81        | 14.88        | 12.40                    |
| NMV C 5749                | M   | NA            | 20.27          | 20.00          | 19.24         | 18.32        | 22.01        | 19.24                    |
| NMV C 5750.1              | F   | NA            | 10.73          | NA             | 11.73         | 9.81         | 12.29        | 11.73                    |

|                   |   |       |       |       |       |       |       |       |
|-------------------|---|-------|-------|-------|-------|-------|-------|-------|
| NMV C 5752.2      | F | 14.82 | NA    | NA    | NA    | 11.12 | 18.53 | 14.82 |
| NMW 19.330.46     | U | NA    | 14.20 | 14.25 | 12.79 | 12.18 | 15.44 | 12.79 |
| NMW 27.409.9      | U | NA    | 14.37 | 15.39 | 12.96 | 12.35 | 16.68 | 12.96 |
| NRM 566599        | F | 14.77 | 14.64 | 14.78 | 14.42 | 11.08 | 18.46 | 14.42 |
| QM 11445          | U | NA    | 18.86 | 18.24 | 20.41 | 16.71 | 21.38 | 20.41 |
| QM 11446          | U | NA    | 11.61 | 12.69 | NA    | 10.61 | 13.75 | 11.61 |
| QM 1968           | U | NA    | 20.05 | 21.29 | 19.97 | 18.32 | 23.07 | 19.97 |
| QVM 1958:1:27     | M | NA    | 22.80 | 21.20 | NA    | 19.42 | 24.76 | 22.80 |
| QVM 1958:1:29     | U | NA    | 13.58 | 13.82 | 11.61 | 11.06 | 14.98 | 11.61 |
| QVM 1962:1:54     | U | NA    | 12.99 | 14.11 | 12.26 | 11.68 | 15.29 | 12.26 |
| QVM 1962:1:57     | U | NA    | 13.33 | NA    | 13.28 | 12.18 | 14.48 | 13.28 |
| RBINS 31.Z        | U | NA    | 22.80 | 22.05 | 20.76 | 19.78 | 24.76 | 20.76 |
| RBINS 32          | U | NA    | 17.01 | 16.17 | 15.38 | 14.65 | 18.47 | 15.38 |
| RBINS 32.B        | U | NA    | 15.19 | 15.78 | 13.83 | 13.17 | 17.10 | 13.83 |
| SAM M 1953        | M | NA    | 21.51 | 20.18 | 22.06 | 18.49 | 23.36 | 22.06 |
| SAM M 1955        | U | NA    | 19.39 | 21.10 | 20.20 | 17.72 | 22.87 | 20.20 |
| SAM M 1959        | F | 14.72 | 16.04 | 17.23 | 15.77 | 11.04 | 18.67 | 15.77 |
| SAM M 1960        | U | 15.78 | 15.28 | 15.39 | 15.83 | 11.84 | 19.73 | 15.83 |
| SAM M 922         | F | NA    | 13.50 | 12.83 | 12.05 | 11.48 | 14.66 | 12.05 |
| SAM M 95          | M | 21.60 | 21.28 | 21.96 | 22.45 | 16.20 | 27.00 | 22.45 |
| SMNS Z-MAM 002019 | M | 19.93 | 17.72 | 19.73 | 18.37 | 14.95 | 24.91 | 18.37 |
| TMAG 1238         | U | NA    | 18.13 | NA    | 16.26 | 15.49 | 19.69 | 16.26 |
| TMAG 1239         | U | NA    | 19.39 | NA    | 17.63 | 16.79 | 21.06 | 17.63 |
| TMAG 1240         | U | NA    | 15.85 | 19.64 | 21.35 | 14.49 | 22.36 | 21.35 |
| TMAG 1242         | U | NA    | 15.66 | NA    | 15.07 | 14.31 | 17.01 | 15.07 |
| TMAG 1244         | U | NA    | 19.18 | NA    | 21.43 | 17.53 | 22.45 | 21.43 |
| TMAG 1245         | U | NA    | 21.28 | NA    | NA    | 19.45 | 23.11 | 21.28 |
| TMAG 1246         | U | NA    | NA    | 17.06 | NA    | 15.63 | 18.49 | 17.06 |
| TMAG 1276         | U | NA    | 14.73 | 14.85 | 15.89 | 13.46 | 16.64 | 15.89 |
| TMAG 1989         | U | NA    | NA    | 17.47 | NA    | 16.01 | 18.93 | 17.47 |
| TMAG 1990         | U | 11.70 | NA    | NA    | NA    | 8.78  | 14.63 | 11.70 |
| TMAG 2062         | U | NA    | NA    | 17.56 | NA    | 16.09 | 19.03 | 17.56 |
| TMAG 2313         | U | NA    | NA    | 21.48 | NA    | 19.68 | 23.28 | 21.48 |
| TMAG 244          | U | NA    | 23.28 | 20.36 | 20.31 | 18.65 | 25.28 | 20.31 |
| TMAG 2455         | U | NA    | NA    | 21.57 | NA    | 19.76 | 23.38 | 21.57 |
| TMAG 295          | U | 16.58 | 14.28 | 14.25 | 13.77 | 12.44 | 20.73 | 13.77 |
| TMAG 297          | U | NA    | 18.34 | 19.19 | 18.02 | 16.76 | 20.80 | 18.02 |
| TMAG A 312        | F | 15.58 | 15.10 | 14.25 | NA    | 11.69 | 19.48 | 15.58 |
| TMAG A 315        | M | 23.02 | 19.83 | 20.64 | NA    | 17.27 | 28.78 | 23.02 |
| TMAG A 321        | M | NA    | 23.77 | 22.54 | 23.95 | 20.65 | 25.82 | 23.95 |
| TMAG 890          | U | 18.69 | 21.74 | 20.55 | 19.15 | 14.02 | 23.61 | 19.15 |
| UMZC A6.7/19      | U | NA    | 20.72 | 20.09 | 20.27 | 18.41 | 22.50 | 20.27 |
| UMZC A6.7/3       | U | NA    | 13.07 | NA    | 12.60 | 11.94 | 14.20 | 12.60 |
| UMZC A6.7/8       | F | 19.63 | 15.38 | 15.00 | 14.60 | 13.74 | 24.54 | 14.60 |
| WAM M 195         | U | 17.17 | 18.23 | 17.47 | 16.41 | 12.88 | 21.46 | 16.41 |
| ZMB Mam 2986      | M | 15.83 | 17.92 | 17.56 | 15.65 | 11.87 | 19.79 | 15.65 |
| ZMB Mam 4264      | F | NA    | NA    | 13.32 | 11.54 | 10.99 | 14.44 | 11.54 |
| ZMB Mam 47902     | M | NA    | 18.65 | 19.02 | 17.75 | 16.91 | 20.61 | 17.75 |

## S11: Thylacine cranial descriptive statistics.

**Table S11:** Descriptive statistics for *Thylacinus cynocephalus* cranial linear measurements for adult known-sex females, males and total mixed-and unknown-sex sample. All measurements are in millimeters. F-statistic and *p*-values are from a MANOVA of natural log transformed linear measurements of known female and male specimens by sex, with significant *p*-values after Benjamini-Hochberg correction (FDR = 0.10) bolded and italicised

| Measure | Sex    | <i>n</i> | Mean  | SD    | CV%   | Min   | Max   | <i>F</i> (1,28) | <i>p</i>                |
|---------|--------|----------|-------|-------|-------|-------|-------|-----------------|-------------------------|
| CBL     | Female | 14       | 196.3 | 8.96  | 4.56  | 182.3 | 209.6 | 73.3            | <b><i>&lt;0.001</i></b> |
|         | Male   | 16       | 229.7 | 12.28 | 5.35  | 208.9 | 252.6 |                 |                         |
|         | Total  | 64       | 214.7 | 19.50 | 9.08  | 182.3 | 252.6 |                 |                         |
| CC      | Female | 14       | 33.5  | 0.94  | 2.80  | 32.0  | 35.4  | 56.8            | <b><i>&lt;0.001</i></b> |
|         | Male   | 16       | 37.5  | 1.86  | 4.96  | 34.6  | 40.5  |                 |                         |
|         | Total  | 64       | 35.7  | 2.38  | 6.65  | 32.0  | 41.1  |                 |                         |
| Car     | Female | 14       | 59.5  | 2.06  | 3.46  | 56.1  | 62.8  | 69.6            | <b><i>&lt;0.001</i></b> |
|         | Male   | 16       | 66.1  | 2.27  | 3.43  | 62.6  | 70.5  |                 |                         |
|         | Total  | 64       | 63.3  | 4.07  | 6.43  | 56.1  | 71.9  |                 |                         |
| PL      | Female | 14       | 107.1 | 3.95  | 3.69  | 101.2 | 113.2 | 61.3            | <b><i>&lt;0.001</i></b> |
|         | Male   | 16       | 122.7 | 6.76  | 5.51  | 113.3 | 134.7 |                 |                         |
|         | Total  | 64       | 114.7 | 9.63  | 8.40  | 99.2  | 134.7 |                 |                         |
| CB      | Female | 14       | 32.7  | 1.71  | 5.23  | 29.7  | 35.7  | 68.0            | <b><i>&lt;0.001</i></b> |
|         | Male   | 16       | 39.3  | 2.68  | 6.80  | 34.3  | 44.3  |                 |                         |
|         | Total  | 64       | 36.2  | 4.00  | 11.02 | 29.7  | 44.6  |                 |                         |
| IOB     | Female | 14       | 41.8  | 2.66  | 6.37  | 37.5  | 46.9  | 61.3            | <b><i>&lt;0.001</i></b> |
|         | Male   | 16       | 49.9  | 3.05  | 6.12  | 45.1  | 56.4  |                 |                         |
|         | Total  | 64       | 45.8  | 4.97  | 10.84 | 37.3  | 56.4  |                 |                         |
| POP     | Female | 14       | 61.4  | 3.34  | 5.45  | 55.9  | 65.8  | 42.7            | <b><i>&lt;0.001</i></b> |
|         | Male   | 16       | 71.1  | 4.45  | 6.26  | 63.8  | 78.4  |                 |                         |
|         | Total  | 64       | 66.3  | 6.24  | 9.41  | 55.5  | 78.6  |                 |                         |
| POC     | Female | 14       | 34.1  | 1.06  | 3.11  | 32.8  | 36.1  | 11.0            | <b><i>0.0026</i></b>    |
|         | Male   | 16       | 35.3  | 0.93  | 2.65  | 33.5  | 36.8  |                 |                         |
|         | Total  | 64       | 35.0  | 1.43  | 4.09  | 31.7  | 38.2  |                 |                         |
| ZB      | Female | 14       | 109.6 | 4.51  | 4.12  | 102.7 | 116.6 | 85.8            | <b><i>&lt;0.001</i></b> |
|         | Male   | 16       | 133.3 | 9.05  | 6.79  | 116.6 | 149.4 |                 |                         |
|         | Total  | 64       | 121.6 | 13.76 | 11.31 | 101.2 | 149.4 |                 |                         |
| OCB     | Female | 14       | 60.5  | 2.73  | 4.52  | 55.6  | 64.9  | 90.8            | <b><i>&lt;0.001</i></b> |
|         | Male   | 16       | 72.0  | 3.84  | 5.34  | 65.3  | 79.8  |                 |                         |
|         | Total  | 64       | 66.7  | 6.34  | 9.51  | 55.6  | 79.8  |                 |                         |
| LM3     | Female | 14       | 14.2  | 0.84  | 5.87  | 12.7  | 15.9  | 20.4            | <b><i>&lt;0.001</i></b> |
|         | Male   | 16       | 15.5  | 0.68  | 4.41  | 14.2  | 16.4  |                 |                         |
|         | Total  | 64       | 15.0  | 1.03  | 6.85  | 12.7  | 17.6  |                 |                         |
| WaM3    | Female | 14       | 11.0  | 0.64  | 5.86  | 9.7   | 12.3  | 36.2            | <b><i>&lt;0.001</i></b> |
|         | Male   | 16       | 12.2  | 0.48  | 3.89  | 11.3  | 13.0  |                 |                         |
|         | Total  | 64       | 11.7  | 0.86  | 7.31  | 9.7   | 13.8  |                 |                         |

## S12: Major-axis regressions.

**Table S12a:** Results of bivariate major axis regression analyses of the known-sex adult thylacine samples (n = 14 female; 16 male). Values are natural log-transformed linear metrics on condylobasal length. Significant *p*-values after Benjamini-Hochberg correction (FDR = 0.10) are bolded.

| Condylobasal length |        |       |           |                |                  |               |                   |
|---------------------|--------|-------|-----------|----------------|------------------|---------------|-------------------|
|                     | Sex    | Slope | Intercept | R <sup>2</sup> | Slope ≠ Isometry | Slopes differ | Intercepts differ |
| CC                  | Female | 0.485 | 0.951     | 0.440          | 0.032            | 0.195         | 0.549             |
|                     | Male   | 0.890 | -1.215    | 0.418          | 0.717            |               |                   |
| CAR                 | Female | 0.736 | 0.201     | 0.803          | 0.050            | 0.351         | 0.986             |
|                     | Male   | 0.588 | 0.997     | 0.665          | <b>0.011</b>     |               |                   |
| PL                  | Female | 0.776 | 0.576     | 0.718          | 0.182            | 0.177         | 0.229             |
|                     | Male   | 1.029 | -0.786    | 0.904          | 0.745            |               |                   |
| CB                  | Female | 1.159 | -2.634    | 0.829          | 0.280            | 0.493         | 0.399             |
|                     | Male   | 1.287 | -3.326    | 0.938          | <b>0.002</b>     |               |                   |
| IOB                 | Female | 1.570 | -4.557    | 0.503          | 0.130            | 0.375         | 0.534             |
|                     | Male   | 1.164 | -2.418    | 0.709          | 0.388            |               |                   |
| POP                 | Female | 1.344 | -2.980    | 0.396          | 0.417            | 0.838         | 0.219             |
|                     | Male   | 1.231 | -2.429    | 0.586          | 0.367            |               |                   |
| POC                 | Female | 0.435 | 1.230     | 0.189          | 0.146            | 0.851         | 0.158             |
|                     | Male   | 0.382 | 1.489     | 0.452          | <b>0.002</b>     |               |                   |
| ZB                  | Female | 0.889 | 0.003     | 0.731          | 0.514            | 0.084         | 0.644             |
|                     | Male   | 1.312 | -2.241    | 0.834          | 0.037            |               |                   |
| OCB                 | Female | 1.005 | -1.206    | 0.865          | 0.965            | 0.994         | 0.228             |
|                     | Male   | 1.004 | -1.182    | 0.858          | 0.972            |               |                   |
| LM3                 | Female | 1.343 | -4.436    | 0.669          | 0.166            | 0.125         | <b>0.006</b>      |
|                     | Male   | 0.767 | -1.432    | 0.466          | 0.365            |               |                   |
| WaM3                | Female | 1.369 | -4.833    | 0.609          | 0.193            | 0.073         | 0.079             |
|                     | Male   | 0.580 | -0.649    | 0.304          | 0.178            |               |                   |

**Table S12b:** Results of bivariate major axis regression analyses of the known-sex adult thylacine samples (n = 14 female; 16 male). Values are natural log-transformed linear metrics on best-estimate body masses. Significant p-values after Benjamini-Hochberg correction (FDR = 0.10) are bolded.

| Body mass |        |       |           |                |                  |               |                   |
|-----------|--------|-------|-----------|----------------|------------------|---------------|-------------------|
|           | Sex    | Slope | Intercept | R <sup>2</sup> | Slope ≠ Isometry | Slopes differ | Intercepts differ |
| CC        | Female | 0.187 | 3.023     | 0.440          | 0.043            | 0.340         | 0.098             |
|           | Male   | 0.295 | 2.750     | 0.418          | 0.713            |               |                   |
| CAR       | Female | 0.310 | 3.277     | 0.802          | 0.661            | 0.293         | 0.545             |
|           | Male   | 0.241 | 3.478     | 0.666          | 0.078            |               |                   |
| PL        | Female | 0.316 | 3.849     | 0.718          | 0.805            | 0.086         | 0.561             |
|           | Male   | 0.444 | 3.495     | 0.904          | <b>0.009</b>     |               |                   |
| CB        | Female | 0.482 | 2.226     | 0.829          | 0.027            | 0.315         | 0.725             |
|           | Male   | 0.561 | 2.010     | 0.938          | <b>&lt;0.001</b> |               |                   |
| IOB       | Female | 0.519 | 2.377     | 0.504          | 0.205            | 0.711         | 0.664             |
|           | Male   | 0.456 | 2.559     | 0.709          | 0.117            |               |                   |
| POP       | Female | 0.401 | 3.069     | 0.397          | 0.621            | 0.812         | 0.901             |
|           | Male   | 0.444 | 2.949     | 0.586          | 0.258            |               |                   |
| POC       | Female | 0.141 | 3.160     | 0.189          | 0.056            | 0.896         | 0.280             |
|           | Male   | 0.154 | 3.108     | 0.451          | <b>0.002</b>     |               |                   |
| ZB        | Female | 0.359 | 3.759     | 0.731          | 0.648            | 0.053         | 0.101             |
|           | Male   | 0.546 | 3.275     | 0.834          | <b>0.003</b>     |               |                   |
| OcB       | Female | 0.427 | 2.986     | 0.865          | 0.063            | 0.979         | 0.067             |
|           | Male   | 0.425 | 3.016     | 0.858          | 0.052            |               |                   |
| LM3       | Female | 0.509 | 1.325     | 0.668          | 0.093            | 0.079         | 0.101             |
|           | Male   | 0.273 | 1.931     | 0.466          | 0.483            |               |                   |
| WaM3      | Female | 0.497 | 1.095     | 0.608          | 0.153            | 0.038         | 0.900             |
|           | Male   | 0.194 | 1.926     | 0.304          | 0.120            |               |                   |

## S13: 3D GM analyses

**Table S13a:** Principle components analysis and ANOVA of the principle components for *Thylacinus cynocephalus* cranial 3D geometric morphometrics. Results are presented for the total sample (n = 64). Significance of ANOVA results adjusted via the Benjamini-Hochberg procedure (FDR = 0.10); significant results are bolded.

| Component | Variance % | Cumulative % | F(1,12) | p                |
|-----------|------------|--------------|---------|------------------|
| PC 1      | 27.34      | 27.34        | 22.41   | <b>&lt;0.001</b> |
| PC 2      | 17.04      | 44.38        | 2.45    | 0.225            |
| PC 3      | 14.26      | 58.64        | <0.01   | 0.0890           |
| PC 4      | 9.30       | 67.94        | 0.81    | 0.556            |
| PC 5      | 6.29       | 74.23        | 0.08    | 0.515            |
| PC 6      | 4.76       | 78.99        | <0.01   | 0.440            |
| PC 7      | 4.62       | 83.61        | 0.38    | 0.547            |
| PC 8      | 3.96       | 87.60        | 0.93    | 0.122            |
| PC 9      | 3.76       | 91.32        | 0.05    | 0.785            |
| PC 10     | 2.88       | 94.21        | 0.01    | 0.312            |
| PC 11     | 2.32       | 96.53        | 0.07    | 0.783            |
| PC 12     | 1.83       | 98.36        | <0.01   | 0.807            |
| PC 13     | 1.64       | 100.00       | 0.02    | 0.905            |

**Table S13b:** Procrustes coordinates regression analyses. Significant results are bolded.

|                | Df | SS        | MS         | R <sup>2</sup> | F      | Z      | P            |
|----------------|----|-----------|------------|----------------|--------|--------|--------------|
| log(Csize)     | 1  | 0.0033272 | 0.0033272  | 0.25075        | 4.016  | 3.591  | <b>0.001</b> |
| Residuals      | 12 | 0.0099416 | 0.0008285  | 0.74925        |        |        |              |
| Total          | 13 | 0.0132688 |            |                |        |        |              |
| sex            | 1  | 0.0028882 | 0.00288816 | 0.21767        | 3.3387 | 3.1372 | <b>0.001</b> |
| Residuals      | 12 | 0.0103806 | 0.00086505 | 0.78233        |        |        |              |
| Total          | 13 | 0.0132688 |            |                |        |        |              |
| log(Csize)     | 1  | 0.0033272 | 0.0033272  | 0.25075        | 4.2065 | 3.5910 | <b>0.001</b> |
| sex            | 1  | 0.0010372 | 0.0010372  | 0.07817        | 1.3113 | 1.0928 | 0.142        |
| log(Csize):sex | 1  | 0.0009949 | 0.0009949  | 0.07498        | 1.2578 | 1.2510 | 0.108        |
| Residuals      | 10 | 0.0079095 | 0.0007909  | 0.59610        |        |        |              |
| Total          | 13 | 0.0132688 |            |                |        |        |              |



## S14: Sexual Dimorphism Index

**Table S14:** Sexual Dimorphism Index (SDI) values for thylacines and select comparative marsupial and placental carnivores.

| Taxon                          | Female mass (kg) | Male mass (kg) | SDI   | Data Source                    |
|--------------------------------|------------------|----------------|-------|--------------------------------|
| <i>Thylacinus cynocephalus</i> | 13.69            | 19.74          | 44.19 | <b>This study</b>              |
|                                | s = 1.51         | s = 2.48       |       |                                |
|                                | n = 17           | n = 21         |       |                                |
| <u>Dasyuridae</u>              |                  |                |       |                                |
| <i>Dasyurus geoffroii</i>      | 0.89             | 1.31           | 47.19 | Serena & Soderquist, 1988      |
| <i>Dasyurus hallucatus</i>     | 0.45             | 0.76           | 68.89 | Oakwood, 1997                  |
| <i>Dasyurus maculatus</i>      | 1.67             | 3.23           | 93.41 | Jones, 1997                    |
| <i>Dasyurus viverrinus</i>     | 0.71             | 1.11           | 56.34 | Jones, 1997                    |
| <i>Sarcophilus harrisii</i>    | 5.40             | 8.43           | 56.11 | Jones, 1997                    |
| <u>Canidae</u>                 |                  |                |       |                                |
| <i>Canis latrans</i>           | 12.50            | 14.00          | 12.00 | Bekoff, 1977                   |
| <i>Canis lupus</i>             | 36.50            | 50.00          | 36.99 | Mech, 1974                     |
| <i>Canis simensis</i>          | 12.80            | 16.20          | 26.56 | Sillero-Zubiri & Gottelli 1994 |
| <i>Chrysocyon brachyurus</i>   | 22.70            | 23.80          | 4.85  | Silva & Downing, 1995          |
| <i>Cuon alpinus</i>            | 11.50            | 15.80          | 37.39 | Sillero-Zubiri et al 2004      |
| <i>Lupulella mesomelas</i>     | 7.70             | 8.40           | 9.09  | Walton & Joly, 2003            |
| <i>Lycalopex culpaeus</i>      | 5.40             | 6.50           | 20.37 | Sillero-Zubiri et al 2004      |
| <i>Lycaon pictus</i>           | 24.00            | 28.00          | 16.67 | Sillero-Zubiri et al 2004      |
| <i>Vulpes vulpes</i>           | 5.30             | 6.30           | 18.87 | Sillero-Zubiri et al 2004      |
| <u>Felidae</u>                 |                  |                |       |                                |
| <i>Caracal caracal</i>         | 9.72             | 13.50          | 38.89 | Silva & Downing, 1995          |
| <i>Lynx lynx</i>               | 18.80            | 19.60          | 4.26  | Silva & Downing, 1995          |
| <i>Neofelis nebulosa</i>       | 9.45             | 12.00          | 27.98 | Silva & Downing, 1995          |

## References S14

- Bekoff M. 1977. *Canis latrans*. *Mammalian Species*:1-9.
- Jones M. 1997. Character displacement in Australian dasyurid carnivores: size relationships and prey size patterns. *Ecology* 78:2569-2587.
- Mech LD. 1974. *Canis lupus*. *Mammalian Species*:1-6. 10.2307/3503924
- Oakwood M. 1997. The ecology of the northern quoll, *Dasyurus hallucatus* Doctor of Philosophy. Australian National University.
- Serena M, and Soderquist T. 1988. Growth and development of pouch young of wild and captive *Dasyurus geoffroii* (Marsupialia, Dasyuridae). *Australian Journal of Zoology* 36:533-543. 10.1071/ZO9880533
- Sillero-Zubiri C, and Gottelli D. 1994. *Canis simensis*. *Mammalian Species*:1-6. 10.2307/3504136

Sillero-Zubiri C, Hoffmann M, and Macdonald DW. 2004. Canids: foxes, wolves, jackals, and dogs: status survey and conservation action plan: IUCN Gland, Switzerland.

Silva M, and Downing JA. 1995. CRC handbook of mammalian body masses: CRC press.

Walton LR, and Joly DO. 2003. *Canis mesomelas*. *Mammalian Species* 2003:1-9.

## S15: Sex assignment of unknown-sex thylacines.

**Table S15:** Unknown-sex specimen *post hoc* sex assignment. Thylacines with body mass less than two standard deviations from the male mean (mass < 14.8 kg) were labelled as “female”, and with body mass greater than two standard deviations from the female mean (mass > 16.7 kg) as “male”. Specimens agreeing in *post hoc* sex prediction between mass and cranial LDA assignment were ascribed to that sex. Discordant sex assignments (n = 3) are bolded and italicised. For discussion regarding specimen UMZC A6.7/3 see Note in **S2** above.

| Specimen             | Sex (listed) | Body mass sex assignment | LDA sex assignment | Sex assignment (this study) |
|----------------------|--------------|--------------------------|--------------------|-----------------------------|
| NHMUK ZD 1972.666    | F            | F                        | F                  | -                           |
| NHMUK ZD 1839.6.11.3 | F            | F                        | F                  | -                           |
| NHMUK ZD 1852.1.16.7 | F            | F                        | F                  | -                           |
| NHMUK ZD 1852.1.16.8 | F            | F                        | F                  | -                           |
| NHMUK ZD 1893.4.13.1 | F            | U                        | F                  | -                           |
| NMNH 124662          | F            | U                        | F                  | -                           |
| NMV C 5741.2         | F            | F                        | NA                 | -                           |
| NMV C 5742.1         | F            | F                        | F                  | -                           |
| NMV C 5748.1         | F            | F                        | F                  | -                           |
| NMV C 5750.1         | F            | F                        | F                  | -                           |
| NMV C 5752.2         | F            | U                        | NA                 | -                           |
| NRM 566599           | F            | F                        | F                  | -                           |
| SAM M M 1959         | F            | U                        | F                  | -                           |
| SAM M M 922          | F            | F                        | F                  | -                           |
| TMAG 312             | F            | U                        | NA                 | -                           |
| UMZC A6.7/8          | F            | F                        | F                  | -                           |
| ZMB MAM M 4264       | F            | F                        | F                  | -                           |
| AM M 19465           | M            | M                        | M                  | -                           |
| AMNH 35244           | M            | M                        | M                  | -                           |
| AMNH 144316          | M            | M                        | M                  | -                           |
| NHMUK ZD 1972.665    | M            | M                        | M                  | -                           |
| NHMUK ZD 1972.175    | M            | M                        | NA                 | -                           |
| NHMUK ZD 1963.8.30.1 | M            | M                        | M                  | -                           |
| NHMUK ZD 1846.4.4.1  | M            | M                        | M                  | -                           |
| NHMUK ZD 1883.8.22.1 | M            | M                        | M                  | -                           |
| NMNH 38801           | M            | M                        | NA                 | -                           |
| NMNH 155407          | M            | U                        | M                  | -                           |
| NMV C 2163.1         | M            | U                        | NA                 | -                           |
| NMV C 5746.1         | M            | M                        | NA                 | -                           |
| NMV C 5749           | M            | M                        | M                  | -                           |
| QVM 1958:1:27        | M            | M                        | NA                 | -                           |
| SAM M M 95           | M            | M                        | M                  | -                           |
| SAM M M 1953         | M            | M                        | M                  | -                           |
| SMNS Z-MAM M 2019    | M            | M                        | M                  | -                           |
| TMAG 315             | M            | M                        | NA                 | -                           |

|                        |   |          |          |   |
|------------------------|---|----------|----------|---|
| TMAG 321               | M | M        | M        | - |
| ZMB MAM M 2986         | M | U        | M        | - |
| ZMB MAM M 47902        | M | M        | M        | - |
| AM M 401               | U | M        | M        | M |
| AM M 402               | U | F        | F        | F |
| AM M 763               | U | M        | M        | M |
| AM M 767               | U | M        | NA       | U |
| AM M 768               | U | M        | M        | M |
| AM M 769               | U | M        | M        | M |
| AM M 771               | U | F        | F        | F |
| AM M 788               | U | M        | NA       | U |
| AM M 789               | U | F        | NA       | U |
| AM M 1821              | U | <b>M</b> | <b>F</b> | U |
| AM M 27836             | U | F        | F        | F |
| AMNH 35866             | U | U        | F        | U |
| AMNH 42259             | U | M        | NA       | U |
| AMNH 146829            | U | U        | F        | U |
| LEEDM C.1869.46.2.4088 | U | M        | M        | M |
| LEEDM C.1869.46.4.4087 | U | M        | M        | M |
| LEEDM C.1869.46.5.4091 | U | M        | M        | M |
| NHM 1000               | U | M        | NA       | U |
| NHM 1002               | U | F        | F        | F |
| NMV C 28178            | U | F        | NA       | U |
| NMV C 2009             | U | NA       | NA       | U |
| NMW 19.330.46          | U | F        | F        | F |
| NMW 27.409.9           | U | F        | F        | F |
| QM 11445               | U | NA       | NA       | U |
| QVM 1958:1:29          | U | F        | NA       | U |
| QVM 1962:1:54          | U | <b>F</b> | <b>M</b> | U |
| QVM 1962:1:57          | U | F        | F        | F |
| RBINS 32               | U | U        | F        | U |
| RBINS 31.Z             | U | M        | M        | M |
| RBINS 32.B             | U | F        | F        | F |
| SAM M M 1955           | U | M        | M        | M |
| SAM M M 1960           | U | U        | M        | U |
| TMAG 244               | U | <b>M</b> | <b>F</b> | U |
| TMAG 295               | U | F        | F        | F |
| TMAG 297               | U | M        | M        | M |
| TMAG 890               | U | M        | M        | M |
| TMAG 1238              | U | U        | F        | U |
| TMAG 1239              | U | M        | NA       | U |
| TMAG 1240              | U | M        | NA       | U |
| TMAG 1242              | U | U        | M        | U |
| TMAG 1244              | U | M        | M        | M |
| TMAG 1245              | U | M        | NA       | U |
| TMAG 1246              | U | M        | NA       | U |

|              |    |   |    |   |
|--------------|----|---|----|---|
| TMAG 1276    | U  | U | M  | U |
| TMAG 1989    | U  | M | NA | U |
| TMAG 1990    | U  | F | NA | U |
| TMAG 2062    | U  | M | NA | U |
| TMAG 2313    | U  | M | NA | U |
| TMAG 2455    | U  | M | NA | U |
| UMZC A6.7/19 | U  | M | M  | M |
| UMZC A6.7/3  | M* | F | F  | F |
| WAM M 195    | U  | U | M  | U |
| QM 11445     | U  | M | NA | U |
| QM 11446     | U  | F | NA | U |
| QM 1968      | U  | M | NA | U |
